# Supplementary material for: A modeling framework to assess specific energy, costs and environmental impacts of Li-ion and Na-ion batteries
Source: Royal Society of Chemistry journal article supplement (doi:10.1039/c9se00427k), 2019-01-01
Supplement: c9se00427k2.pdf [file c9se00427k2.pdf]

## **S2: Specific energies of LIB cells and NIB cells**

The below table lists optimized cell design parameters and computed practical specific energies of LIB and NIB cells (without cell packaging). The optimization was performed using the MATLAB fmincon (interior-point) solver. To ensure (near-)global optimality of the solution, the optimization solver was called from 500 randomly selected start points as described in the main part of the paper.

|                                        | <b>Thickness anode [μm]</b> | <b>Porosity anode [%]</b> | <b>Porosity cathode [%]</b> | <b>Specific energy [Wh/kg]</b> |
|----------------------------------------|-----------------------------|---------------------------|-----------------------------|--------------------------------|
| LIB 10C                                | 34.28                       | 29.93                     | 46.88                       | 157.7                          |
| LIB 4C                                 | 49.85                       | 27.31                     | 41.07                       | 198.6                          |
| LIB 0.25C                              | 118.14                      | 20.05                     | 24.16                       | 262.1                          |
| NIB present base scenario 10C          | 44.29                       | 28.15                     | 36.30                       | 99.8                           |
| NIB present base scenario 4C           | 57.96                       | 25.30                     | 29.96                       | 117.4                          |
| NIB present base scenario 0.25C        | 119.92                      | 17.30                     | 19.02                       | 145.4                          |
| NIB present optimistic scenario 10C    | 50.34                       | 27.75                     | 34.50                       | 103.5                          |
| NIB present optimistic scenario 4C     | 65.29                       | 26.02                     | 28.80                       | 120.5                          |
| NIB present optimistic scenario 0.25C  | 130.17                      | 17.94                     | 17.55                       | 147.6                          |
| NIB present pessimistic scenario 10C   | 39.15                       | 30.15                     | 41.03                       | 85.8                           |
| NIB present pessimistic scenario 4C    | 49.83                       | 25.26                     | 33.52                       | 108.3                          |
| NIB present pessimistic scenario 0.25C | 110.65                      | 17.97                     | 20.41                       | 143.0                          |
| NIB future base scenario 10C           | 36.03                       | 27.51                     | 38.96                       | 176.8                          |
| NIB future base scenario 4C            | 50.69                       | 25.37                     | 33.22                       | 207.2                          |
| NIB future base scenario 0.25C         | 112.55                      | 17.68                     | 20.33                       | 249.8                          |
| NIB future optimistic scenario 10C     | 46.34                       | 27.04                     | 39.64                       | 184.5                          |
| NIB future optimistic scenario 4C      | 58.88                       | 24.19                     | 30.80                       | 213.5                          |
| NIB future optimistic scenario 0.25C   | 121.94                      | 17.18                     | 18.95                       | 253.0                          |
| NIB future pessimistic scenario 10C    | 30.28                       | 27.26                     | 44.10                       | 155.4                          |
| NIB future pessimistic scenario 4C     | 41.88                       | 24.01                     | 36.23                       | 192.0                          |
| NIB future pessimistic scenario 0.25C  | 98.96                       | 18.31                     | 21.40                       | 245.3                          |
