# Supplementary material for: A modeling framework to assess specific energy, costs and environmental impacts of Li-ion and Na-ion batteries
Source: Royal Society of Chemistry journal article supplement (doi:10.1039/c9se00427k), 2019-01-01
Supplement: c9se00427k3.xlsx [file c9se00427k3.xlsx]

## Sheet: Cell_cost
Supplementary information S3: Battery cell cost calculation and inventories for LCA
Simon F. Schneider [1,2], Christian Bauer [2], Petr Novák [1], Erik J. Berg [3]
[1] Electrochemistry Laboratory, Paul Scherrer Institut, CH-5232 Villigen PSI, Switzerland
[2] Laboratory for Energy Systems Analysis, Paul Scherrer Institut, CH-5232 Villigen PSI, Switzerland
[3] Department of Chemistry, Uppsala University, 751 21 Uppsala, Sweden
						Scrap rate [%]	9
General data
Component	Thickness [m]	Density [kg/m3]	Cost [$/kg]	Comment/Reference
Curr. col./2 anode LIB (Cu)	4e-06	8960	25	Cost: Berg et al.; Journal of The Electrochemical Society, 165 (1) A5001-A5005 (2018)
Curr. col./2 cathode LIB (Al)	1e-05	2700	15	Cost: Berg et al.; Journal of The Electrochemical Society, 165 (1) A5001-A5005 (2018)
Curr. col./2 anode NIB (Al)	4e-06	2700	15
Curr. col./2 cathode NIB (Al)	1e-05	2700	15
Separator (39% porosity)	2.5e-05	946	120	Berg et al.; Journal of The Electrochemical Society, 165 (1) A5001-A5005 (2018). Berg et al.; Journal of The Electrochemical Society, 162 (14) A2468-A2475 (2015)
Generic binder (3wt% of electrode)		1800	10	Berg et al.; Journal of The Electrochemical Society, 162 (14) A2468-A2475 (2015)
Carbon additive (4 wt% of electrode)		2260	20	Berg et al.; Journal of The Electrochemical Society, 165 (1) A5001-A5005 (2018). Berg et al.; Journal of The Electrochemical Society, 162 (14) A2468-A2475 (2015)
Generic electrolyte for LIB		1200	18	Berg et al.; Journal of The Electrochemical Society, 165 (1) A5001-A5005 (2018)
Generic electrolyte for NIB		1200	17.5928	Computed from cost of generic electrolyte for LIB by conceptually replacing lithium by sodium.
LIB cathode act. mat. (LiNi1/3Mn1/3Co1/3O2)		4750	20	Cost: Vaalma et al.; Nature Reviews Materials; 3, 18013 (2018)
NIB cathode act. mat. (NaNi1/3Mn1/3Co1/3O2)		4750	12.8181	Computed from cost of LIB cathode material by conceptually replacing lithium by sodium.
LIB anode act. mat. (graphite)		2200	15	Cost: Vaalma et al.; Nature Reviews Materials; 3, 18013 (2018)
NIB anode act. mat. (hard carbon)		1700	15	Cost: Vaalma et al.; Nature Reviews Materials; 3, 18013 (2018)
NMP solvent				NMP solvent costs are considered in process costs.
Li2CO3			13.9	U.S. Geological Survey, 2018, Minearal commodity summaries 2018 (2017 price for battery grade lithium carbonate)
Na2CO3			0.5	Vaalma et al.; Nature Reviews Materials; 3, 18013 (2018)
Battery cell packaging			0	Material costs for battery cell packaging are assumed to be included in processing costs.
Material costs
		LIB 10C	LIB 4C	LIB 0.25C	base scenario NIB 10C	base scenario NIB 4C	base scenario NIB 0.25C	optimistic scenario NIB 10C	optimistic scenario NIB 4C	optimistic scenario NIB 0.25C	pessimistic scenario NIB 10C	pessimistic scenario NIB 4C	pessimistic scenario NIB 0.25C
Battery cell geometry and specific energy (obtained from P2D battery cell model)	anode thickness [m]	3.428e-05	4.985e-05	0.00011814	4.429e-05	5.796e-05	0.00011992	5.034e-05	6.529e-05	0.00013017	3.915e-05	4.983e-05	0.00011065
	cathode thickness [m]	5.437e-05	7.393e-05	0.00014974	5.467e-05	6.765e-05	0.00013402	6.076e-05	7.424e-05	0.00014177	5.075e-05	6.13e-05	0.0001248
	anode porosity [-]	0.2993	0.2731	0.2005	0.2815	0.253	0.173	0.2775	0.2602	0.1794	0.3015	0.2526	0.1797
	cathode porosity [-]	0.4688	0.4107	0.2416	0.363	0.2996	0.1902	0.345	0.288	0.1755	0.4103	0.3352	0.2041
	specific energy [Wh/kg]	157.7	198.6	262.1	99.8	117.4	145.4	103.5	120.5	147.6	85.8	108.3	143
Material requirements per 1 m2 of battery cell "sandwhich"	Cu [kg/m2]	0.03584	0.03584	0.03584	0	0	0	0	0	0	0	0	0
	Al [kg/m2]	0.027	0.027	0.027	0.0378	0.0378	0.0378	0.0378	0.0378	0.0378	0.0378	0.0378	0.0378
	Separator [kg/m2]	0.0144265	0.0144265	0.0144265	0.0144265	0.0144265	0.0144265	0.0144265	0.0144265	0.0144265	0.0144265	0.0144265	0.0144265
	Generic binder [kg/m2]	0.00553102	0.00834358	0.0217486	0.00641321	0.00872566	0.0199864	0.00732923	0.00973429	0.0215262	0.00551125	0.007505	0.018292
	Carbon additive [kg/m2]	0.00737469	0.0111248	0.0289981	0.00855094	0.0116342	0.0266486	0.0097723	0.0129791	0.0287016	0.00734834	0.0100067	0.0243894
	Generic electrolyte [kg/m2]	0.0545984	0.0644725	0.0835371	0.0504754	0.0536182	0.0671841	0.0536179	0.0577435	0.0695798	0.0508517	0.0514618	0.0661266
	LiNi1/3Mn1/3Co1/3O2 [kg/m2]	0.122531	0.184836	0.481798	0	0	0	0	0	0	0	0	0
	NaNi1/3Mn1/3Co1/3O2 [kg/m2]	0	0	0	0.147747	0.201022	0.460443	0.168845	0.224257	0.495911	0.126968	0.172894	0.421407
	Graphite [kg/m2]	0.0489305	0.0738153	0.192407	0	0	0	0	0	0	0	0	0
	Hard carbon [kg/m2]	0	0	0	0.0510629	0.0694739	0.159137	0.0583611	0.0775057	0.171402	0.0438804	0.0597608	0.145645
	Sum of all materials [kg/m2]	0.316232	0.419858	0.885756	0.316475	0.3967	0.785625	0.350152	0.434446	0.839347	0.286787	0.353855	0.728087
Specific energy per 1 m2 of battery cell "sandwhich"	Area-specific energy [Wh/m2]	49.8698	83.3839	232.157	31.5842	46.5726	114.23	36.2407	52.3508	123.888	24.6063	38.3225	104.116
Material requirements per 1 kWh battery cell capacity, including scrap rate	Cu [kg/kWh]	0.783352	0.468503	0.168273	0	0	0	0	0	0	0	0	0
	Al [kg/kWh]	0.590137	0.352946	0.126768	1.30451	0.884684	0.360694	1.1369	0.787037	0.332576	1.67445	1.07514	0.39573
	Separator [kg/kWh]	0.315319	0.188584	0.067734	0.497871	0.337643	0.13766	0.433901	0.300375	0.126929	0.639059	0.410331	0.151032
	Generic binder [kg/kWh]	0.120891	0.109068	0.102112	0.221325	0.204218	0.190714	0.220439	0.202678	0.189394	0.244135	0.213463	0.1915
	Carbon additive [kg/kWh]	0.161188	0.145424	0.136149	0.2951	0.272291	0.254285	0.293918	0.270238	0.252525	0.325514	0.284618	0.255333
	Generic electrolyte [kg/kWh]	1.19335	0.842789	0.392216	1.74195	1.2549	0.641081	1.61265	1.20228	0.612184	2.25261	1.46372	0.692282
	LiNi1/3Mn1/3Co1/3O2 [kg/kWh]	2.67815	2.41619	2.26209	0	0	0	0	0	0	0	0	0
	NaNi1/3Mn1/3Co1/3O2 [kg/kWh]	0	0	0	5.09886	4.70477	4.39362	5.07829	4.66928	4.36317	5.6244	4.9176	4.41173
	Graphite [kg/kWh]	1.06947	0.964919	0.903374	0	0	0	0	0	0	0	0	0
	Hard carbon [kg/kWh]	0	0	0	1.76222	1.62599	1.51851	1.75531	1.61375	1.50804	1.9438	1.69977	1.52477
	Sum of all materials [kg/kWh]	6.91186	5.48842	4.15872	10.9218	9.2845	7.49656	10.5314	9.04564	7.38482	12.704	10.0646	7.62238
	NMP solvent (costs included in process costs)
		0	0	0	0	0	0	0	0	0	0	0	0
Li/Na raw material requirements and costs	Li/Na [kg/kWh]	1.06261	0.951451	0.878515	2.47864	2.2715	2.09782	2.46324	2.25246	2.08221	2.74874	2.38097	2.10862
	Li/Na [$/kWh]	14.7703	13.2252	12.2114	1.23932	1.13575	1.04891	1.23162	1.12623	1.0411	1.37437	1.19049	1.05431
Battery cell costs
		LIB 10C	LIB 4C	LIB 0.25C	base scenario NIB 10C	base scenario NIB 4C	base scenario NIB 0.25C	optimistic scenario NIB 10C	optimistic scenario NIB 4C	optimistic scenario NIB 0.25C	pessimistic scenario NIB 10C	pessimistic scenario NIB 4C	pessimistic scenario NIB 0.25C	Relevant resources for modeling approach
Material costs [$/kWh]		161.792	121.604	83.8329	209.864	168.048	119.296	196.999	160.491	116.483	251.636	187.475	122.682
Of material costs: Li/Na raw material costs [$/kWh]		14.7703	13.2252	12.2114	1.23932	1.13575	1.04891	1.23162	1.12623	1.0411	1.37437	1.19049	1.05431
Material costs without Li/Na raw material costs [$/kWh]		147.022	108.379	71.6215	208.625	166.913	118.247	195.767	159.365	115.442	250.262	186.285	121.628
Li/Na costs electrolyte [$/kWh]		0.512338	0.361832	0.168389	0.0384759	0.027718	0.0141601	0.0356199	0.0265558	0.0135218	0.0497552	0.0323304	0.015291
Li/Na costs cathode [$/kWh]		14.258	12.8633	12.043	1.20084	1.10803	1.03475	1.196	1.09967	1.02758	1.32462	1.15816	1.03902
Current collector [$/kWh]		28.4358	17.0068	6.10834	19.5677	13.2703	5.4104	17.0535	11.8056	4.98864	25.1167	16.1271	5.93595
Cathode active material costs without Li/Na [$/kWh]		39.305	35.4604	33.1989	64.1568	59.1981	55.283	63.8979	58.7515	54.8999	70.7694	61.876	55.5109
Anode active material costs [$/kWh]		16.042	14.4738	13.5506	26.4334	24.3899	22.7776	26.3296	24.2063	22.6207	29.157	25.4965	22.8715
Other material purchase costs [$/kWh]		63.2389	41.4376	18.7637	98.467	70.0545	34.7763	88.4862	64.6015	32.9324	125.219	82.7852	37.3093
Process costs 2014 [$/kWh]		101.93	69	37.5994	149.362	107.73	55.7683	132.741	98.0468	52.98	186.047	126.617	59.2427	Patry et al.; Energy Science and Engineering 2015; 3(1): 71-84
Process costs 2019 [$/kWh]		40.3996	27.3481	14.9025	59.1995	42.6986	22.1037	52.6117	38.8607	20.9985	73.7396	50.1843	23.4808	Berckmans et al.; Energies 2017, 10, 1314. Tsiropoulos et al. 2018; JRC Science for policy report.		Implementation of learning curve for process costs: For labor costs, Berckmans et al. specify a discount factor of 0.574 for each market doubling. A yearly market growth of 26% therefore gives rise to the following expression for the process costs in year 2019: Process_costs_2019 = 0.574^(LOG(1.26^5)/LOG(2))*Process_costs_2014
Overhead costs 2014 [$/kWh]		85.8092	58.764	33.0055	124.216	90.527	48.6719	110.98	82.8128	46.4148	154.178	105.836	51.4776	Patry et al.; Energy Science and Engineering 2015; 3(1): 71-85
Overhead costs 2019 [$/kWh]		53.9476	36.9445	20.7503	78.0938	56.9137	30.5997	69.7726	52.0638	29.1807	96.9305	66.5382	32.3636	Berckmans et al.; Energies 2017; 10, 1314. Tsiropoulos et al. 2018; JRC Science for policy report.		Implementation of learning curve for overhead costs: For overhead and profit margins, Berckmans et al. specify a discount factor of 0.757 for each market doubling. A yearly market growth of 26% therefore gives rise to the following expression for the overhead costs in year 2019: Overhead_costs_2019 = 0.757^(LOG(1.26^5)/LOG(2))*Overhead_costs_2014
Total costs 2014 [$/kWh]		349.531	249.368	154.438	483.443	366.305	223.736	440.72	341.351	215.877	591.861	419.928	233.402	Patry et al.; Energy Science and Engineering 2015; 3(1): 71-85
Total costs 2019 [$/kWh]		256.139	185.896	119.486	347.158	267.661	172	319.383	251.416	166.662	422.306	304.198	178.526	Patry et al.; Energy Science and Engineering 2015; 3(1): 71-85

## Sheet: LIB025C
cutoff	10
Database	LIB-025C import
format	Excel spreadsheet
Activity	LIB-025C cell
comment
location	GLO
production amount	1
unit	kWh
Exchanges
name	amount	unit	database	categories	location	type	reference product	Comment
LIB-025C cell	1	kilowatt hour	LIB-025C import		GLO	production
Anode paste	0.97137	kg	LIB-025C import		GLO	technosphere
Cathode paste	2.43236	kg	LIB-025C import		GLO	technosphere
Copper current collector	0.168273	kg	LIB-025C import		GLO	technosphere
Aluminum current collector	0.126768	kg	LIB-025C import		GLO	technosphere
Electrolyte	0.392216	kg	LIB-025C import		GLO	technosphere
Separator	0.067734	kg	LIB-025C import		GLO	technosphere
Cell container	0.12862	kg	LIB-025C import		GLO	technosphere		Assumption: cell container accounts for 3wt.% of battery cell
Water	17.7371	unit	LIB-025C import		GLO	technosphere
Energy	21.7967	kilowatt hour	LIB-025C import		KR	technosphere
Activity	Water
comment
location	GLO
production amount	1
unit	unit
Exchanges
name	amount	unit	database	categories	location	type	reference product	Comment
market for water, decarbonised, at user	1	kilogram	ecoinvent 3.3 cutoff		GLO	technosphere	water, decarbonised, at user
Activity	Energy
comment
location	KR
production amount	1
unit	kilowatt hour
Exchanges
name	amount	unit	database	categories	location	type	reference product	Comment
market for electricity, medium voltage	0.5	kilowatt hour	ecoinvent 3.3 cutoff		KR	technosphere	electricity, medium voltage
heat production, natural gas, at industrial furnace low-NOx >100kW	1.8	megajoule	ecoinvent 3.3 cutoff		RoW	technosphere	heat, district or industrial, natural gas
Activity	Copper current collector
comment
location	GLO
production amount	1
unit	kg
Exchanges
name	amount	unit	database	categories	location	type	reference product	Comment
market for copper	1	kg	ecoinvent 3.3 cutoff		GLO	technosphere	copper
market for sheet rolling, copper	1	kg	ecoinvent 3.3 cutoff		GLO	technosphere	sheet rolling, copper
Activity	Anode paste
comment
location	GLO
production amount	1
unit	kg
Exchanges
name	amount	unit	database	categories	location	type	reference product	Comment
market for anode, graphite, for lithium-ion battery	0.93	kg	ecoinvent 3.3 cutoff		GLO	technosphere	anode, graphite, for lithium-ion battery
market for carboxymethyl cellulose, powder	0.021	kg	ecoinvent 3.3 cutoff		GLO	technosphere	carboxymethyl cellulose, powder
market for styrene butadiene rubber (SBR)	0.009	kg	LIB-025C import			technosphere	market for styrene butadiene rubber (SBR)
market for carbon black	0.04	kg	ecoinvent 3.3 cutoff		GLO	technosphere	carbon black
Activity	Aluminum current collector
comment
location	GLO
production amount	1
unit	kg
Exchanges
name	amount	unit	database	categories	location	type	reference product	Comment
market for aluminium scrap, new	1	kg	ecoinvent 3.3 cutoff		RoW	technosphere	aluminium scrap, new
market for sheet rolling, aluminium	1	kg	ecoinvent 3.3 cutoff		GLO	technosphere	sheet rolling, aluminium
Activity	Cathode paste
comment
location	GLO
production amount	1
unit	kg
Exchanges
name	amount	unit	database	categories	location	type	reference product	Comment
market for polyvinylfluoride	0.03	kg	ecoinvent 3.3 cutoff		GLO	technosphere	polyvinylfluoride
market for carbon black	0.04	kg	ecoinvent 3.3 cutoff		GLO	technosphere	carbon black
Positive active material	0.93	kg	LIB-025C import		GLO	technosphere
market for N-methyl-2-pyrrolidone	0.41	kg	ecoinvent 3.3 cutoff		GLO	technosphere	N-methyl-2-pyrrolidone
Activity	Positive active material
comment	Positive active material = Li(Ni1/3Co1/3Mn1/3)O2, this inventory is adapted from Majeau-Bettez 2011 and Ellingsen 2014
location	GLO
production amount	1
unit	kg
Exchanges
name	amount	unit	database	categories	location	type	reference product	Comment
market for lithium hydroxide	0.25	kg	ecoinvent 3.3 cutoff		GLO	technosphere	lithium hydroxide
Ni1/3Co1/3Mn1/3(OH)2	0.95	kg	LIB-025C import		GLO	technosphere
market for chemical factory, organics	4.6e-10	unit	ecoinvent 3.3 cutoff		GLO	technosphere	chemical factory, organics
market for heat, district or industrial, natural gas	0.55	MJ	ecoinvent 3.3 cutoff		RoW	technosphere	heat, district or industrial, natural gas
Activity	Ni1/3Co1/3Mn1/3(OH)2
comment	Inventory adapted from: Majeau-Bettez et al.; Environmental Science and Technology 2011, 45, 4548. Ellingsen et al.; J. Industrial Ecology 2014, 18 (1), 113
location	GLO
production amount	1
unit	kg
Exchanges
name	amount	unit	database	categories	location	type	reference product	Comment
market for nickel sulfate	0.57	kg	ecoinvent 3.3 cutoff		GLO	technosphere	nickel sulfate
Cobalt sulfate	0.57	kg	LIB-025C import		GLO	technosphere
market for manganese sulfate	0.55	kg	ecoinvent 3.3 cutoff		GLO	technosphere	manganese sulfate
market for sodium hydroxide, without water, in 50% solution state	1.76	kg	ecoinvent 3.3 cutoff		GLO	technosphere	sodium hydroxide, without water, in 50% solution state
market for chemical factory, organics	4e-10	unit	ecoinvent 3.3 cutoff		GLO	technosphere	chemical factory, organics
Sulfate	1.6	kg	biosphere3	water		biosphere
Activity	Cobalt sulfate
comment	Inventory adapted from: Majeau-Bettez et al.; Environmental Science and Technology 2011, 45, 4548
location	GLO
production amount	1
unit	kg
Exchanges
name	amount	unit	database	categories	location	type	reference product	Comment
market for cobalt	0.3802	kg	ecoinvent 3.3 cutoff		GLO	technosphere	cobalt
market for carbon monoxide	-0.11	kg	ecoinvent 3.3 cutoff		RER	technosphere	carbon monoxide
market for hydrogen, liquid	-0.0079	kg	ecoinvent 3.3 cutoff		RER	technosphere	hydrogen, liquid
market for blasting	-0.11	kg	ecoinvent 3.3 cutoff		GLO	technosphere	blasting
market for heat, district or industrial, natural gas	-0.76	MJ	ecoinvent 3.3 cutoff		RoW	technosphere	heat, district or industrial, natural gas
Activity	Electrolyte
comment
location	GLO
production amount	1
unit	kg
Exchanges
name	amount	unit	database	categories	location	type	reference product	Comment
market for lithium hexafluorophosphate	0.127	kg	ecoinvent 3.3 cutoff		GLO	technosphere	lithium hexafluorophosphate	1M solution
market for ethylene carbonate	0.873	kg	ecoinvent 3.3 cutoff		GLO	technosphere	ethylene carbonate	Proxy for EC:DMC mixture
Activity	Separator
comment
location	GLO
production amount	1
unit	kg
Exchanges
name	amount	unit	database	categories	location	type	reference product	Comment
market for polypropylene, granulate	0.5	kg	ecoinvent 3.3 cutoff		GLO	technosphere	polypropylene, granulate
market for polyethylene, low density, granulate	0.5	kg	ecoinvent 3.3 cutoff		GLO	technosphere	polyethylene, low density, granulate
market for extrusion, plastic film	1	kg	ecoinvent 3.3 cutoff		GLO	technosphere	extrusion, plastic film
Activity	Cell container
comment
location	GLO
production amount	1
unit	kg
Exchanges
name	amount	unit	database	categories	location	type	reference product	Comment
Tab Aluminum	0.22	kg	LIB-025C import		GLO	technosphere
Tab Copper	0.38	kg	LIB-025C import		GLO	technosphere
Multilayer pouch	0.4	kg	LIB-025C import		GLO	technosphere
Activity	Tab Aluminum
comment
location	GLO
production amount	1
unit	kg
Exchanges
name	amount	unit	database	categories	location	type	reference product	Comment
aluminium ingot, primary, to aluminium, wrought alloy market	1	kg	ecoinvent 3.3 cutoff		GLO	technosphere	aluminium, wrought alloy
market for sheet rolling, aluminium	1	kg	ecoinvent 3.3 cutoff		GLO	technosphere	sheet rolling, aluminium
market for aluminium casting facility	1.5e-10	unit	ecoinvent 3.3 cutoff		GLO	technosphere	aluminium casting facility
Activity	Tab Copper
comment
location	GLO
production amount	1
unit	kg
Exchanges
name	amount	unit	database	categories	location	type	reference product	Comment
market for copper	1	kg	ecoinvent 3.3 cutoff		GLO	technosphere	copper
market for sheet rolling, copper	1	kg	ecoinvent 3.3 cutoff		GLO	technosphere	sheet rolling, copper
market for metal working factory	4.6e-10	unit	ecoinvent 3.3 cutoff		GLO	technosphere	metal working factory
Activity	Multilayer pouch
comment
location	GLO
production amount	1
unit	kg
Exchanges
name	amount	unit	database	categories	location	type	reference product	Comment
aluminium ingot, primary, to aluminium, wrought alloy market	0.5	kg	ecoinvent 3.3 cutoff		GLO	technosphere	aluminium, wrought alloy
market for polyethylene terephthalate, granulate, amorphous	0.078	kg	ecoinvent 3.3 cutoff		GLO	technosphere	polyethylene terephthalate, granulate, amorphous
market for nylon 6	0.08	kg	ecoinvent 3.3 cutoff		GLO	technosphere	nylon 6
market for polypropylene, granulate	0.32	kg	ecoinvent 3.3 cutoff		GLO	technosphere	polypropylene, granulate
market for packaging film, low density polyethylene	0.025	kg	ecoinvent 3.3 cutoff		GLO	technosphere	packaging film, low density polyethylene
market for injection moulding	0.47	kg	ecoinvent 3.3 cutoff		GLO	technosphere	injection moulding
market for sheet rolling, aluminium	0.5	kg	ecoinvent 3.3 cutoff		GLO	technosphere	sheet rolling, aluminium
market for aluminium casting facility	7.7e-11	unit	ecoinvent 3.3 cutoff		GLO	technosphere	aluminium casting facility
market for plastic processing factory	3.5e-10	unit	ecoinvent 3.3 cutoff		GLO	technosphere	plastic processing factory
Activity	market for styrene butadiene rubber (SBR)
production amount	1
reference product	market for styrene butadiene rubber (SBR)
type	process
unit	kilogram
Exchanges
name	amount	unit	database	categories	location	type	reference product
Heat, waste	15.73	megajoule	biosphere3	air		biosphere
NMVOC, non-methane volatile organic compounds, unspecified origin	0.0144	kilogram	biosphere3	air		biosphere
Water, cooling, unspecified natural origin	0.25	cubic meter	biosphere3	natural resource::in water		biosphere
market for styrene butadiene rubber (SBR)	1	kilogram	LIB-025C import			production	market for styrene butadiene rubber (SBR)
market for butadiene	0.752	kilogram	ecoinvent 3.3 cutoff		GLO	technosphere	butadiene
market for cyclohexane	0.01	kilogram	ecoinvent 3.3 cutoff		GLO	technosphere	cyclohexane
market for soap	0.0273	kilogram	ecoinvent 3.3 cutoff		GLO	technosphere	soap
market for sodium persulfate	0.00504	kilogram	ecoinvent 3.3 cutoff		GLO	technosphere	sodium persulfate
market for styrene	0.251	kilogram	ecoinvent 3.3 cutoff		GLO	technosphere	styrene
market for water, deionised, from tap water, at user	1.8	kilogram	ecoinvent 3.3 cutoff		RoW	technosphere	water, deionised, from tap water, at user
market group for electricity, medium voltage	0.55	kilowatt hour	ecoinvent 3.3 cutoff		ENTSO-E	technosphere	electricity, medium voltage
market group for heat, central or small-scale, natural gas	13.75	megajoule	ecoinvent 3.3 cutoff		RER	technosphere	heat, central or small-scale, natural gas
treatment of wastewater, unpolluted, capacity 5E9l/year	-1.8	cubic meter	ecoinvent 3.3 cutoff		RoW	technosphere	wastewater, unpolluted

## Sheet: LIB4C
cutoff	10
Database	LIB-4C import
format	Excel spreadsheet
Activity	LIB-4C cell
comment
location	GLO
production amount	1
unit	kWh
Exchanges
name	amount	unit	database	categories	location	type	reference product	Comment
LIB-4C cell	1	kilowatt hour	LIB-4C import		GLO	production
Anode paste	1.03755	kg	LIB-4C import		GLO	technosphere
Cathode paste	2.59805	kg	LIB-4C import		GLO	technosphere
Copper current collector	0.468503	kg	LIB-4C import		GLO	technosphere
Aluminum current collector	0.352946	kg	LIB-4C import		GLO	technosphere
Electrolyte	0.842789	kg	LIB-4C import		GLO	technosphere
Separator	0.188584	kg	LIB-4C import		GLO	technosphere
Cell container	0.169745	kg	LIB-4C import		GLO	technosphere		Assumption: cell container accounts for 3wt.% of battery cell
Water	32.55	unit	LIB-4C import		GLO	technosphere
Energy	40	kilowatt hour	LIB-4C import		KR	technosphere
Activity	Water
comment
location	GLO
production amount	1
unit	unit
Exchanges
name	amount	unit	database	categories	location	type	reference product	Comment
market for water, decarbonised, at user	1	kilogram	ecoinvent 3.3 cutoff		GLO	technosphere	water, decarbonised, at user
Activity	Energy
comment
location	KR
production amount	1
unit	kilowatt hour
Exchanges
name	amount	unit	database	categories	location	type	reference product	Comment
market for electricity, medium voltage	0.5	kilowatt hour	ecoinvent 3.3 cutoff		KR	technosphere	electricity, medium voltage
heat production, natural gas, at industrial furnace low-NOx >100kW	1.8	megajoule	ecoinvent 3.3 cutoff		RoW	technosphere	heat, district or industrial, natural gas
Activity	Copper current collector
comment
location	GLO
production amount	1
unit	kg
Exchanges
name	amount	unit	database	categories	location	type	reference product	Comment
market for copper	1	kg	ecoinvent 3.3 cutoff		GLO	technosphere	copper
market for sheet rolling, copper	1	kg	ecoinvent 3.3 cutoff		GLO	technosphere	sheet rolling, copper
Activity	Anode paste
comment
location	GLO
production amount	1
unit	kg
Exchanges
name	amount	unit	database	categories	location	type	reference product	Comment
market for anode, graphite, for lithium-ion battery	0.93	kg	ecoinvent 3.3 cutoff		GLO	technosphere	anode, graphite, for lithium-ion battery
market for carboxymethyl cellulose, powder	0.021	kg	ecoinvent 3.3 cutoff		GLO	technosphere	carboxymethyl cellulose, powder
market for styrene butadiene rubber (SBR)	0.009	kg	LIB-4C import			technosphere	market for styrene butadiene rubber (SBR)
market for carbon black	0.04	kg	ecoinvent 3.3 cutoff		GLO	technosphere	carbon black
Activity	Aluminum current collector
comment
location	GLO
production amount	1
unit	kg
Exchanges
name	amount	unit	database	categories	location	type	reference product	Comment
market for aluminium scrap, new	1	kg	ecoinvent 3.3 cutoff		RoW	technosphere	aluminium scrap, new
market for sheet rolling, aluminium	1	kg	ecoinvent 3.3 cutoff		GLO	technosphere	sheet rolling, aluminium
Activity	Cathode paste
comment
location	GLO
production amount	1
unit	kg
Exchanges
name	amount	unit	database	categories	location	type	reference product	Comment
market for polyvinylfluoride	0.03	kg	ecoinvent 3.3 cutoff		GLO	technosphere	polyvinylfluoride
market for carbon black	0.04	kg	ecoinvent 3.3 cutoff		GLO	technosphere	carbon black
Positive active material	0.93	kg	LIB-4C import		GLO	technosphere
market for N-methyl-2-pyrrolidone	0.41	kg	ecoinvent 3.3 cutoff		GLO	technosphere	N-methyl-2-pyrrolidone
Activity	Positive active material
comment	Inventory adapted from: Majeau-Bettez et al.; Environmental Science and Technology 2011, 45, 4548. Ellingsen et al.; J. Industrial Ecology 2014, 18 (1), 113
location	GLO
production amount	1
unit	kg
Exchanges
name	amount	unit	database	categories	location	type	reference product	Comment
market for lithium hydroxide	0.25	kg	ecoinvent 3.3 cutoff		GLO	technosphere	lithium hydroxide
Ni1/3Co1/3Mn1/3(OH)2	0.95	kg	LIB-4C import		GLO	technosphere
market for chemical factory, organics	4.6e-10	unit	ecoinvent 3.3 cutoff		GLO	technosphere	chemical factory, organics
market for heat, district or industrial, natural gas	0.55	MJ	ecoinvent 3.3 cutoff		RoW	technosphere	heat, district or industrial, natural gas
Activity	Ni1/3Co1/3Mn1/3(OH)2
comment	Inventory adapted from: Majeau-Bettez et al.; Environmental Science and Technology 2011, 45, 4548. Ellingsen et al.; J. Industrial Ecology 2014, 18 (1), 113
location	GLO
production amount	1
unit	kg
Exchanges
name	amount	unit	database	categories	location	type	reference product	Comment
market for nickel sulfate	0.57	kg	ecoinvent 3.3 cutoff		GLO	technosphere	nickel sulfate
Cobalt sulfate	0.57	kg	LIB-4C import		GLO	technosphere
market for manganese sulfate	0.55	kg	ecoinvent 3.3 cutoff		GLO	technosphere	manganese sulfate
market for sodium hydroxide, without water, in 50% solution state	1.76	kg	ecoinvent 3.3 cutoff		GLO	technosphere	sodium hydroxide, without water, in 50% solution state
market for chemical factory, organics	4e-10	unit	ecoinvent 3.3 cutoff		GLO	technosphere	chemical factory, organics
Sulfate	1.6	kg	biosphere3	water		biosphere
Activity	Cobalt sulfate
comment	Inventory adapted from: Majeau-Bettez et al.; Environmental Science and Technology 2011, 45, 4548
location	GLO
production amount	1
unit	kg
Exchanges
name	amount	unit	database	categories	location	type	reference product	Comment
market for cobalt	0.3802	kg	ecoinvent 3.3 cutoff		GLO	technosphere	cobalt
market for carbon monoxide	-0.11	kg	ecoinvent 3.3 cutoff		RER	technosphere	carbon monoxide
market for hydrogen, liquid	-0.0079	kg	ecoinvent 3.3 cutoff		RER	technosphere	hydrogen, liquid
market for blasting	-0.11	kg	ecoinvent 3.3 cutoff		GLO	technosphere	blasting
market for heat, district or industrial, natural gas	-0.76	MJ	ecoinvent 3.3 cutoff		RoW	technosphere	heat, district or industrial, natural gas
Activity	Electrolyte
comment
location	GLO
production amount	1
unit	kg
Exchanges
name	amount	unit	database	categories	location	type	reference product	Comment
market for lithium hexafluorophosphate	0.127	kg	ecoinvent 3.3 cutoff		GLO	technosphere	lithium hexafluorophosphate	1M solution
market for ethylene carbonate	0.873	kg	ecoinvent 3.3 cutoff		GLO	technosphere	ethylene carbonate	Proxy for EC:DMC mixture
Activity	Separator
comment
location	GLO
production amount	1
unit	kg
Exchanges
name	amount	unit	database	categories	location	type	reference product	Comment
market for polypropylene, granulate	0.5	kg	ecoinvent 3.3 cutoff		GLO	technosphere	polypropylene, granulate
market for polyethylene, low density, granulate	0.5	kg	ecoinvent 3.3 cutoff		GLO	technosphere	polyethylene, low density, granulate
market for extrusion, plastic film	1	kg	ecoinvent 3.3 cutoff		GLO	technosphere	extrusion, plastic film
Activity	Cell container
comment
location	GLO
production amount	1
unit	kg
Exchanges
name	amount	unit	database	categories	location	type	reference product	Comment
Tab Aluminum	0.22	kg	LIB-4C import		GLO	technosphere
Tab Copper	0.38	kg	LIB-4C import		GLO	technosphere
Multilayer pouch	0.4	kg	LIB-4C import		GLO	technosphere
Activity	Tab Aluminum
comment
location	GLO
production amount	1
unit	kg
Exchanges
name	amount	unit	database	categories	location	type	reference product	Comment
aluminium ingot, primary, to aluminium, wrought alloy market	1	kg	ecoinvent 3.3 cutoff		GLO	technosphere	aluminium, wrought alloy
market for sheet rolling, aluminium	1	kg	ecoinvent 3.3 cutoff		GLO	technosphere	sheet rolling, aluminium
market for aluminium casting facility	1.5e-10	unit	ecoinvent 3.3 cutoff		GLO	technosphere	aluminium casting facility
Activity	Tab Copper
comment
location	GLO
production amount	1
unit	kg
Exchanges
name	amount	unit	database	categories	location	type	reference product	Comment
market for copper	1	kg	ecoinvent 3.3 cutoff		GLO	technosphere	copper
market for sheet rolling, copper	1	kg	ecoinvent 3.3 cutoff		GLO	technosphere	sheet rolling, copper
market for metal working factory	4.6e-10	unit	ecoinvent 3.3 cutoff		GLO	technosphere	metal working factory
Activity	Multilayer pouch
comment
location	GLO
production amount	1
unit	kg
Exchanges
name	amount	unit	database	categories	location	type	reference product	Comment
aluminium ingot, primary, to aluminium, wrought alloy market	0.5	kg	ecoinvent 3.3 cutoff		GLO	technosphere	aluminium, wrought alloy
market for polyethylene terephthalate, granulate, amorphous	0.078	kg	ecoinvent 3.3 cutoff		GLO	technosphere	polyethylene terephthalate, granulate, amorphous
market for nylon 6	0.08	kg	ecoinvent 3.3 cutoff		GLO	technosphere	nylon 6
market for polypropylene, granulate	0.32	kg	ecoinvent 3.3 cutoff		GLO	technosphere	polypropylene, granulate
market for packaging film, low density polyethylene	0.025	kg	ecoinvent 3.3 cutoff		GLO	technosphere	packaging film, low density polyethylene
market for injection moulding	0.47	kg	ecoinvent 3.3 cutoff		GLO	technosphere	injection moulding
market for sheet rolling, aluminium	0.5	kg	ecoinvent 3.3 cutoff		GLO	technosphere	sheet rolling, aluminium
market for aluminium casting facility	7.7e-11	unit	ecoinvent 3.3 cutoff		GLO	technosphere	aluminium casting facility
market for plastic processing factory	3.5e-10	unit	ecoinvent 3.3 cutoff		GLO	technosphere	plastic processing factory
Activity	market for styrene butadiene rubber (SBR)
production amount	1
reference product	market for styrene butadiene rubber (SBR)
type	process
unit	kilogram
Exchanges
name	amount	unit	database	categories	location	type	reference product
Heat, waste	15.73	megajoule	biosphere3	air		biosphere
NMVOC, non-methane volatile organic compounds, unspecified origin	0.0144	kilogram	biosphere3	air		biosphere
Water, cooling, unspecified natural origin	0.25	cubic meter	biosphere3	natural resource::in water		biosphere
market for styrene butadiene rubber (SBR)	1	kilogram	LIB-4C import			production	market for styrene butadiene rubber (SBR)
market for butadiene	0.752	kilogram	ecoinvent 3.3 cutoff		GLO	technosphere	butadiene
market for cyclohexane	0.01	kilogram	ecoinvent 3.3 cutoff		GLO	technosphere	cyclohexane
market for soap	0.0273	kilogram	ecoinvent 3.3 cutoff		GLO	technosphere	soap
market for sodium persulfate	0.00504	kilogram	ecoinvent 3.3 cutoff		GLO	technosphere	sodium persulfate
market for styrene	0.251	kilogram	ecoinvent 3.3 cutoff		GLO	technosphere	styrene
market for water, deionised, from tap water, at user	1.8	kilogram	ecoinvent 3.3 cutoff		RoW	technosphere	water, deionised, from tap water, at user
market group for electricity, medium voltage	0.55	kilowatt hour	ecoinvent 3.3 cutoff		ENTSO-E	technosphere	electricity, medium voltage
market group for heat, central or small-scale, natural gas	13.75	megajoule	ecoinvent 3.3 cutoff		RER	technosphere	heat, central or small-scale, natural gas
treatment of wastewater, unpolluted, capacity 5E9l/year	-1.8	cubic meter	ecoinvent 3.3 cutoff		RoW	technosphere	wastewater, unpolluted

## Sheet: LIB10C
cutoff	10
Database	LIB-10C import
format	Excel spreadsheet
Activity	LIB-10C cell
comment
location	GLO
production amount	1
unit	kWh
Exchanges
name	amount	unit	database	categories	location	type	reference product	Comment
LIB-10C cell	1	kilowatt hour	LIB-10C import		GLO	production
Anode paste	1.14997	kg	LIB-10C import		GLO	technosphere
Cathode paste	2.87973	kg	LIB-10C import		GLO	technosphere
Copper current collector	0.783352	kg	LIB-10C import		GLO	technosphere
Aluminum current collector	0.590137	kg	LIB-10C import		GLO	technosphere
Electrolyte	1.19335	kg	LIB-10C import		GLO	technosphere
Separator	0.315319	kg	LIB-10C import		GLO	technosphere
Cell container	0.213769	kg	LIB-10C import		GLO	technosphere		Assumption: cell container accounts for 3wt.% of battery cell
Water	48.0841	unit	LIB-10C import		GLO	technosphere
Energy	59.0896	kilowatt hour	LIB-10C import		KR	technosphere
Activity	Water
comment
location	GLO
production amount	1
unit	unit
Exchanges
name	amount	unit	database	categories	location	type	reference product	Comment
market for water, decarbonised, at user	1	kilogram	ecoinvent 3.3 cutoff		GLO	technosphere	water, decarbonised, at user
Activity	Energy
comment
location	KR
production amount	1
unit	kilowatt hour
Exchanges
name	amount	unit	database	categories	location	type	reference product	Comment
market for electricity, medium voltage	0.5	kilowatt hour	ecoinvent 3.3 cutoff		KR	technosphere	electricity, medium voltage
heat production, natural gas, at industrial furnace low-NOx >100kW	1.8	megajoule	ecoinvent 3.3 cutoff		RoW	technosphere	heat, district or industrial, natural gas
Activity	Copper current collector
comment
location	GLO
production amount	1
unit	kg
Exchanges
name	amount	unit	database	categories	location	type	reference product	Comment
market for copper	1	kg	ecoinvent 3.3 cutoff		GLO	technosphere	copper
market for sheet rolling, copper	1	kg	ecoinvent 3.3 cutoff		GLO	technosphere	sheet rolling, copper
Activity	Anode paste
comment
location	GLO
production amount	1
unit	kg
Exchanges
name	amount	unit	database	categories	location	type	reference product	Comment
market for anode, graphite, for lithium-ion battery	0.93	kg	ecoinvent 3.3 cutoff		GLO	technosphere	anode, graphite, for lithium-ion battery
market for carboxymethyl cellulose, powder	0.021	kg	ecoinvent 3.3 cutoff		GLO	technosphere	carboxymethyl cellulose, powder
market for styrene butadiene rubber (SBR)	0.009	kg	LIB-10C import			technosphere	market for styrene butadiene rubber (SBR)
market for carbon black	0.04	kg	ecoinvent 3.3 cutoff		GLO	technosphere	carbon black
Activity	Aluminum current collector
comment
location	GLO
production amount	1
unit	kg
Exchanges
name	amount	unit	database	categories	location	type	reference product	Comment
market for aluminium scrap, new	1	kg	ecoinvent 3.3 cutoff		RoW	technosphere	aluminium scrap, new
market for sheet rolling, aluminium	1	kg	ecoinvent 3.3 cutoff		GLO	technosphere	sheet rolling, aluminium
Activity	Cathode paste
comment
location	GLO
production amount	1
unit	kg
Exchanges
name	amount	unit	database	categories	location	type	reference product	Comment
market for polyvinylfluoride	0.03	kg	ecoinvent 3.3 cutoff		GLO	technosphere	polyvinylfluoride
market for carbon black	0.04	kg	ecoinvent 3.3 cutoff		GLO	technosphere	carbon black
Positive active material	0.93	kg	LIB-10C import		GLO	technosphere
market for N-methyl-2-pyrrolidone	0.41	kg	ecoinvent 3.3 cutoff		GLO	technosphere	N-methyl-2-pyrrolidone
Activity	Positive active material
comment	Inventory adapted from: Majeau-Bettez et al.; Environmental Science and Technology 2011, 45, 4548. Ellingsen et al.; J. Industrial Ecology 2014, 18 (1), 113
location	GLO
production amount	1
unit	kg
Exchanges
name	amount	unit	database	categories	location	type	reference product	Comment
market for lithium hydroxide	0.25	kg	ecoinvent 3.3 cutoff		GLO	technosphere	lithium hydroxide
Ni1/3Co1/3Mn1/3(OH)2	0.95	kg	LIB-10C import		GLO	technosphere
market for chemical factory, organics	4.6e-10	unit	ecoinvent 3.3 cutoff		GLO	technosphere	chemical factory, organics
market for heat, district or industrial, natural gas	0.55	MJ	ecoinvent 3.3 cutoff		RoW	technosphere	heat, district or industrial, natural gas
Activity	Ni1/3Co1/3Mn1/3(OH)2
comment	Inventory adapted from: Majeau-Bettez et al.; Environmental Science and Technology 2011, 45, 4548. Ellingsen et al.; J. Industrial Ecology 2014, 18 (1), 113
location	GLO
production amount	1
unit	kg
Exchanges
name	amount	unit	database	categories	location	type	reference product	Comment
market for nickel sulfate	0.57	kg	ecoinvent 3.3 cutoff		GLO	technosphere	nickel sulfate
Cobalt sulfate	0.57	kg	LIB-10C import		GLO	technosphere
market for manganese sulfate	0.55	kg	ecoinvent 3.3 cutoff		GLO	technosphere	manganese sulfate
market for sodium hydroxide, without water, in 50% solution state	1.76	kg	ecoinvent 3.3 cutoff		GLO	technosphere	sodium hydroxide, without water, in 50% solution state
market for chemical factory, organics	4e-10	unit	ecoinvent 3.3 cutoff		GLO	technosphere	chemical factory, organics
Sulfate	1.6	kg	biosphere3	water		biosphere
Activity	Cobalt sulfate
comment	Inventory adapted from: Majeau-Bettez et al.; Environmental Science and Technology 2011, 45, 4548
location	GLO
production amount	1
unit	kg
Exchanges
name	amount	unit	database	categories	location	type	reference product	Comment
market for cobalt	0.3802	kg	ecoinvent 3.3 cutoff		GLO	technosphere	cobalt
market for carbon monoxide	-0.11	kg	ecoinvent 3.3 cutoff		RER	technosphere	carbon monoxide
market for hydrogen, liquid	-0.0079	kg	ecoinvent 3.3 cutoff		RER	technosphere	hydrogen, liquid
market for blasting	-0.11	kg	ecoinvent 3.3 cutoff		GLO	technosphere	blasting
market for heat, district or industrial, natural gas	-0.76	MJ	ecoinvent 3.3 cutoff		RoW	technosphere	heat, district or industrial, natural gas
Activity	Electrolyte
comment
location	GLO
production amount	1
unit	kg
Exchanges
name	amount	unit	database	categories	location	type	reference product	Comment
market for lithium hexafluorophosphate	0.127	kg	ecoinvent 3.3 cutoff		GLO	technosphere	lithium hexafluorophosphate	1M solution
market for ethylene carbonate	0.873	kg	ecoinvent 3.3 cutoff		GLO	technosphere	ethylene carbonate	Proxy for EC:DMC mixture
Activity	Separator
comment
location	GLO
production amount	1
unit	kg
Exchanges
name	amount	unit	database	categories	location	type	reference product	Comment
market for polypropylene, granulate	0.5	kg	ecoinvent 3.3 cutoff		GLO	technosphere	polypropylene, granulate
market for polyethylene, low density, granulate	0.5	kg	ecoinvent 3.3 cutoff		GLO	technosphere	polyethylene, low density, granulate
market for extrusion, plastic film	1	kg	ecoinvent 3.3 cutoff		GLO	technosphere	extrusion, plastic film
Activity	Cell container
comment
location	GLO
production amount	1
unit	kg
Exchanges
name	amount	unit	database	categories	location	type	reference product	Comment
Tab Aluminum	0.22	kg	LIB-10C import		GLO	technosphere
Tab Copper	0.38	kg	LIB-10C import		GLO	technosphere
Multilayer pouch	0.4	kg	LIB-10C import		GLO	technosphere
Activity	Tab Aluminum
comment
location	GLO
production amount	1
unit	kg
Exchanges
name	amount	unit	database	categories	location	type	reference product	Comment
aluminium ingot, primary, to aluminium, wrought alloy market	1	kg	ecoinvent 3.3 cutoff		GLO	technosphere	aluminium, wrought alloy
market for sheet rolling, aluminium	1	kg	ecoinvent 3.3 cutoff		GLO	technosphere	sheet rolling, aluminium
market for aluminium casting facility	1.5e-10	unit	ecoinvent 3.3 cutoff		GLO	technosphere	aluminium casting facility
Activity	Tab Copper
comment
location	GLO
production amount	1
unit	kg
Exchanges
name	amount	unit	database	categories	location	type	reference product	Comment
market for copper	1	kg	ecoinvent 3.3 cutoff		GLO	technosphere	copper
market for sheet rolling, copper	1	kg	ecoinvent 3.3 cutoff		GLO	technosphere	sheet rolling, copper
market for metal working factory	4.6e-10	unit	ecoinvent 3.3 cutoff		GLO	technosphere	metal working factory
Activity	Multilayer pouch
comment
location	GLO
production amount	1
unit	kg
Exchanges
name	amount	unit	database	categories	location	type	reference product	Comment
aluminium ingot, primary, to aluminium, wrought alloy market	0.5	kg	ecoinvent 3.3 cutoff		GLO	technosphere	aluminium, wrought alloy
market for polyethylene terephthalate, granulate, amorphous	0.078	kg	ecoinvent 3.3 cutoff		GLO	technosphere	polyethylene terephthalate, granulate, amorphous
market for nylon 6	0.08	kg	ecoinvent 3.3 cutoff		GLO	technosphere	nylon 6
market for polypropylene, granulate	0.32	kg	ecoinvent 3.3 cutoff		GLO	technosphere	polypropylene, granulate
market for packaging film, low density polyethylene	0.025	kg	ecoinvent 3.3 cutoff		GLO	technosphere	packaging film, low density polyethylene
market for injection moulding	0.47	kg	ecoinvent 3.3 cutoff		GLO	technosphere	injection moulding
market for sheet rolling, aluminium	0.5	kg	ecoinvent 3.3 cutoff		GLO	technosphere	sheet rolling, aluminium
market for aluminium casting facility	7.7e-11	unit	ecoinvent 3.3 cutoff		GLO	technosphere	aluminium casting facility
market for plastic processing factory	3.5e-10	unit	ecoinvent 3.3 cutoff		GLO	technosphere	plastic processing factory
Activity	market for styrene butadiene rubber (SBR)
production amount	1
reference product	market for styrene butadiene rubber (SBR)
type	process
unit	kilogram
Exchanges
name	amount	unit	database	categories	location	type	reference product
Heat, waste	15.73	megajoule	biosphere3	air		biosphere
NMVOC, non-methane volatile organic compounds, unspecified origin	0.0144	kilogram	biosphere3	air		biosphere
Water, cooling, unspecified natural origin	0.25	cubic meter	biosphere3	natural resource::in water		biosphere
market for styrene butadiene rubber (SBR)	1	kilogram	LIB-10C import			production	market for styrene butadiene rubber (SBR)
market for butadiene	0.752	kilogram	ecoinvent 3.3 cutoff		GLO	technosphere	butadiene
market for cyclohexane	0.01	kilogram	ecoinvent 3.3 cutoff		GLO	technosphere	cyclohexane
market for soap	0.0273	kilogram	ecoinvent 3.3 cutoff		GLO	technosphere	soap
market for sodium persulfate	0.00504	kilogram	ecoinvent 3.3 cutoff		GLO	technosphere	sodium persulfate
market for styrene	0.251	kilogram	ecoinvent 3.3 cutoff		GLO	technosphere	styrene
market for water, deionised, from tap water, at user	1.8	kilogram	ecoinvent 3.3 cutoff		RoW	technosphere	water, deionised, from tap water, at user
market group for electricity, medium voltage	0.55	kilowatt hour	ecoinvent 3.3 cutoff		ENTSO-E	technosphere	electricity, medium voltage
market group for heat, central or small-scale, natural gas	13.75	megajoule	ecoinvent 3.3 cutoff		RER	technosphere	heat, central or small-scale, natural gas
treatment of wastewater, unpolluted, capacity 5E9l/year	-1.8	cubic meter	ecoinvent 3.3 cutoff		RoW	technosphere	wastewater, unpolluted

## Sheet: pessimistic_NIB025C
cutoff	10
Database	pessimistic NIB-025C import
format	Excel spreadsheet
Activity	pessimistic NIB-025C cell
comment
location	GLO
production amount	1
unit	kWh
Exchanges
name	amount	unit	database	categories	location	type	reference product	Comment
pessimistic NIB-025C cell	1	kilowatt hour	pessimistic NIB-025C import		GLO	production
Anode paste	1.63954	kg	pessimistic NIB-025C import		GLO	technosphere
Cathode paste	4.7438	kg	pessimistic NIB-025C import		GLO	technosphere
Copper current collector	0	kg	pessimistic NIB-025C import		GLO	technosphere
Aluminum current collector	0.39573	kg	pessimistic NIB-025C import		GLO	technosphere
Electrolyte	0.692282	kg	pessimistic NIB-025C import		GLO	technosphere
Separator	0.151032	kg	pessimistic NIB-025C import		GLO	technosphere
Cell container	0.235744	kg	pessimistic NIB-025C import		GLO	technosphere		Assumption: cell container accounts for 3wt.% of battery cell
Water	27.9471	unit	pessimistic NIB-025C import		GLO	technosphere
Energy	34.3436	kilowatt hour	pessimistic NIB-025C import		KR	technosphere
Activity	Water
comment
location	GLO
production amount	1
unit	unit
Exchanges
name	amount	unit	database	categories	location	type	reference product	Comment
market for water, decarbonised, at user	1	kilogram	ecoinvent 3.3 cutoff		GLO	technosphere	water, decarbonised, at user
Activity	Energy
comment
location	KR
production amount	1
unit	kilowatt hour
Exchanges
name	amount	unit	database	categories	location	type	reference product	Comment
market for electricity, medium voltage	0.5	kilowatt hour	ecoinvent 3.3 cutoff		KR	technosphere	electricity, medium voltage
heat production, natural gas, at industrial furnace low-NOx >100kW	1.8	megajoule	ecoinvent 3.3 cutoff		RoW	technosphere	heat, district or industrial, natural gas
Activity	Copper current collector
comment
location	GLO
production amount	1
unit	kg
Exchanges
name	amount	unit	database	categories	location	type	reference product	Comment
market for copper	1	kg	ecoinvent 3.3 cutoff		GLO	technosphere	copper
market for sheet rolling, copper	1	kg	ecoinvent 3.3 cutoff		GLO	technosphere	sheet rolling, copper
Activity	Anode paste
comment
location	GLO
production amount	1
unit	kg
Exchanges
name	amount	unit	database	categories	location	type	reference product	Comment
Hard carbon	0.93	kg	base NIB-10C import		GLO	technosphere
market for carboxymethyl cellulose, powder	0.021	kg	ecoinvent 3.3 cutoff		GLO	technosphere	carboxymethyl cellulose, powder
market for styrene butadiene rubber (SBR)	0.009	kg	base NIB-10C import			technosphere	market for styrene butadiene rubber (SBR)
market for carbon black	0.04	kg	ecoinvent 3.3 cutoff		GLO	technosphere	carbon black
Activity	Hard carbon
comment	Hard carbon from sugar precursor, inventory from: Peters et al.; Energy and Environmental Science 2016, 9, 1744
location	GLO
production amount	1
unit	kg
Exchanges
name	amount	unit	database	categories	location	type	reference product	Comment
Hard carbon	1	kg	base NIB-10C import		GLO	production
market for sugar beet	20	kg	ecoinvent 3.3 cutoff		RoW	technosphere	sugar beet
market group for electricity, medium voltage	0.107	kilowatt hour	ecoinvent 3.3 cutoff		ENTSO-E	technosphere	electricity, medium voltage
market for heat, central or small-scale, natural gas	9.52	MJ	ecoinvent 3.3 cutoff		Europe without Switzerland	technosphere	heat, central or small-scale, natural gas
market for water, deionised, from tap water, at user	0.178	kg	ecoinvent 3.3 cutoff		RoW	technosphere	water, deionised, from tap water, at user
market for chemicals, inorganic	0.267	kg	ecoinvent 3.3 cutoff		GLO	technosphere	chemical, inorganic
market for nitrogen, liquid	6.99	kg	ecoinvent 3.3 cutoff		RoW	technosphere	nitrogen, liquid
market for chemical factory, organics	4e-10	unit	ecoinvent 3.3 cutoff		GLO	technosphere	chemical factory, organics
Carbon dioxide, non-fossil	29.33	kg	biosphere3	air		biosphere					Emissions that cannot be considered because they are not in the database
Carbon monoxide, non-fossil	0.000353	kg	biosphere3	air		biosphere
Nitrogen oxides	0.00616	kg	biosphere3	air		biosphere					Dust
Sulfur dioxide	0.00117	kg	biosphere3	air		biosphere					Wastewater
NMVOC, non-methane volatile organic compounds, unspecified origin	0.00011	kg	biosphere3	air		biosphere					Solid waste
Hydrogen fluoride	8.89e-06	kg	biosphere3	air		biosphere
Hydrogen chloride	0.000508	kg	biosphere3	air		biosphere
Heat, waste	9.9	MJ	biosphere3	air		biosphere
Activity	Aluminum current collector
comment
location	GLO
production amount	1
unit	kg
Exchanges
name	amount	unit	database	categories	location	type	reference product	Comment
market for aluminium scrap, new	1	kg	ecoinvent 3.3 cutoff		RoW	technosphere	aluminium scrap, new
market for sheet rolling, aluminium	1	kg	ecoinvent 3.3 cutoff		GLO	technosphere	sheet rolling, aluminium
Activity	Cathode paste
comment
location	GLO
production amount	1
unit	kg
Exchanges
name	amount	unit	database	categories	location	type	reference product	Comment
market for polyvinylfluoride	0.03	kg	ecoinvent 3.3 cutoff		GLO	technosphere	polyvinylfluoride
market for carbon black	0.04	kg	ecoinvent 3.3 cutoff		GLO	technosphere	carbon black
Positive active material	0.93	kg	base NIB-10C import		GLO	technosphere
market for N-methyl-2-pyrrolidone	0.41	kg	ecoinvent 3.3 cutoff		GLO	technosphere	N-methyl-2-pyrrolidone
Activity	Positive active material
comment	Positive active material = Na(Ni1/3Co1/3Mn1/3)O2, it is assumed that the material can be synthesized in the same reaction as its Li analogue
location	GLO
production amount	1
unit	kg
Exchanges
name	amount	unit	database	categories	location	type	reference product	Comment
market for sodium hydroxide, without water, in 50% solution state	0.356	kg	ecoinvent 3.3 cutoff		GLO	technosphere	sodium hydroxide, without water, in 50% solution state
Ni1/3Co1/3Mn1/3(OH)2	0.814	kg	base NIB-10C import		GLO	technosphere
market for chemical factory, organics	4.6e-10	unit	ecoinvent 3.3 cutoff		GLO	technosphere	chemical factory, organics
market for heat, district or industrial, natural gas	0.55	MJ	ecoinvent 3.3 cutoff		RoW	technosphere	heat, district or industrial, natural gas
Activity	Ni1/3Co1/3Mn1/3(OH)2
comment	Inventory adapted from: Majeau-Bettez et al.; Environmental Science and Technology 2011, 45, 4548. Ellingsen et al.; J. Industrial Ecology 2014, 18 (1), 113
location	GLO
production amount	1
unit	kg
Exchanges
name	amount	unit	database	categories	location	type	reference product	Comment
market for nickel sulfate	0.57	kg	ecoinvent 3.3 cutoff		GLO	technosphere	nickel sulfate
Cobalt sulfate	0.57	kg	base NIB-10C import		GLO	technosphere
market for manganese sulfate	0.55	kg	ecoinvent 3.3 cutoff		GLO	technosphere	manganese sulfate
market for sodium hydroxide, without water, in 50% solution state	1.76	kg	ecoinvent 3.3 cutoff		GLO	technosphere	sodium hydroxide, without water, in 50% solution state
market for chemical factory, organics	4e-10	unit	ecoinvent 3.3 cutoff		GLO	technosphere	chemical factory, organics
Sulfate	1.6	kg	biosphere3	water		biosphere
Activity	Cobalt sulfate
comment	Inventory adapted from: Majeau-Bettez et al.; Environmental Science and Technology 2011, 45, 4548
location	GLO
production amount	1
unit	kg
Exchanges
name	amount	unit	database	categories	location	type	reference product	Comment
market for cobalt	0.3802	kg	ecoinvent 3.3 cutoff		GLO	technosphere	cobalt
market for carbon monoxide	-0.11	kg	ecoinvent 3.3 cutoff		RER	technosphere	carbon monoxide
market for hydrogen, liquid	-0.0079	kg	ecoinvent 3.3 cutoff		RER	technosphere	hydrogen, liquid
market for blasting	-0.11	kg	ecoinvent 3.3 cutoff		GLO	technosphere	blasting
market for heat, district or industrial, natural gas	-0.76	MJ	ecoinvent 3.3 cutoff		RoW	technosphere	heat, district or industrial, natural gas
Activity	Electrolyte
comment
location	GLO
production amount	1
unit	kg
Exchanges
name	amount	unit	database	categories	location	type	reference product	Comment
Sodium hexafluorophosphate	0.14	kg	base NIB-10C import		GLO	technosphere		1M solution
market for ethylene carbonate	0.86	kg	ecoinvent 3.3 cutoff		GLO	technosphere	ethylene carbonate
Activity	Sodium hexafluorophosphate
comment	Inventory from: Peters et al.; Energy and Environmental Science 2016, 9, 1744
location	GLO
production amount	1
unit	kg
Exchanges
name	amount	unit	database	categories	location	type	reference product	Comment
Sodium hexafluorophosphate	1	kg	base NIB-10C import		GLO	production
market for sodium fluoride	0.319	kg	ecoinvent 3.3 cutoff		GLO	technosphere	sodium fluoride
market for phosphorus pentachloride	1.98	kg	ecoinvent 3.3 cutoff		GLO	technosphere	phosphorus pentachloride
market for hydrogen fluoride	4.04	kg	ecoinvent 3.3 cutoff		GLO	technosphere	hydrogen fluoride				Emissions that cannot be considered because they are not in the database
market for nitrogen, liquid	0.00125	kg	ecoinvent 3.3 cutoff		RoW	technosphere	nitrogen, liquid
market for lime, hydrated, packed	7.44	kg	ecoinvent 3.3 cutoff		GLO	technosphere	lime, hydrated, packed				Disposal of salts
market group for electricity, medium voltage	0.541	kilowatt hour	ecoinvent 3.3 cutoff		ENTSO-E	technosphere	electricity, medium voltage				Wastewater
market for chemical factory, organics	4e-10	unit	ecoinvent 3.3 cutoff		GLO	technosphere	chemical factory, organics				NaF recycled
Phosphorus trichloride	0.263	kg	biosphere3	air		biosphere
Heat, waste	1.95	MJ	biosphere3	air		biosphere
Activity	Separator
comment
location	GLO
production amount	1
unit	kg
Exchanges
name	amount	unit	database	categories	location	type	reference product	Comment
market for polypropylene, granulate	0.5	kg	ecoinvent 3.3 cutoff		GLO	technosphere	polypropylene, granulate
market for polyethylene, low density, granulate	0.5	kg	ecoinvent 3.3 cutoff		GLO	technosphere	polyethylene, low density, granulate
market for extrusion, plastic film	1	kg	ecoinvent 3.3 cutoff		GLO	technosphere	extrusion, plastic film
Activity	Cell container
comment
location	GLO
production amount	1
unit	kg
Exchanges
name	amount	unit	database	categories	location	type	reference product	Comment
Tab Aluminum	0.22	kg	base NIB-10C import		GLO	technosphere
Tab Copper	0.38	kg	base NIB-10C import		GLO	technosphere
Multilayer pouch	0.4	kg	base NIB-10C import		GLO	technosphere
Activity	Tab Aluminum
comment
location	GLO
production amount	1
unit	kg
Exchanges
name	amount	unit	database	categories	location	type	reference product	Comment
aluminium ingot, primary, to aluminium, wrought alloy market	1	kg	ecoinvent 3.3 cutoff		GLO	technosphere	aluminium, wrought alloy
market for sheet rolling, aluminium	1	kg	ecoinvent 3.3 cutoff		GLO	technosphere	sheet rolling, aluminium
market for aluminium casting facility	1.5e-10	unit	ecoinvent 3.3 cutoff		GLO	technosphere	aluminium casting facility
Activity	Tab Copper
comment
location	GLO
production amount	1
unit	kg
Exchanges
name	amount	unit	database	categories	location	type	reference product	Comment
market for copper	1	kg	ecoinvent 3.3 cutoff		GLO	technosphere	copper
market for sheet rolling, copper	1	kg	ecoinvent 3.3 cutoff		GLO	technosphere	sheet rolling, copper
market for metal working factory	4.6e-10	unit	ecoinvent 3.3 cutoff		GLO	technosphere	metal working factory
Activity	Multilayer pouch
comment
location	GLO
production amount	1
unit	kg
Exchanges
name	amount	unit	database	categories	location	type	reference product	Comment
aluminium ingot, primary, to aluminium, wrought alloy market	0.5	kg	ecoinvent 3.3 cutoff		GLO	technosphere	aluminium, wrought alloy
market for polyethylene terephthalate, granulate, amorphous	0.078	kg	ecoinvent 3.3 cutoff		GLO	technosphere	polyethylene terephthalate, granulate, amorphous
market for nylon 6	0.08	kg	ecoinvent 3.3 cutoff		GLO	technosphere	nylon 6
market for polypropylene, granulate	0.32	kg	ecoinvent 3.3 cutoff		GLO	technosphere	polypropylene, granulate
market for packaging film, low density polyethylene	0.025	kg	ecoinvent 3.3 cutoff		GLO	technosphere	packaging film, low density polyethylene
market for injection moulding	0.47	kg	ecoinvent 3.3 cutoff		GLO	technosphere	injection moulding
market for sheet rolling, aluminium	0.5	kg	ecoinvent 3.3 cutoff		GLO	technosphere	sheet rolling, aluminium
market for aluminium casting facility	7.7e-11	unit	ecoinvent 3.3 cutoff		GLO	technosphere	aluminium casting facility
market for plastic processing factory	3.5e-10	unit	ecoinvent 3.3 cutoff		GLO	technosphere	plastic processing factory
Activity	market for styrene butadiene rubber (SBR)
production amount	1
reference product	market for styrene butadiene rubber (SBR)
type	process
unit	kilogram
Exchanges
name	amount	unit	database	categories	location	type	reference product
Heat, waste	15.73	megajoule	biosphere3	air		biosphere
NMVOC, non-methane volatile organic compounds, unspecified origin	0.0144	kilogram	biosphere3	air		biosphere
Water, cooling, unspecified natural origin	0.25	cubic meter	biosphere3	natural resource::in water		biosphere
market for styrene butadiene rubber (SBR)	1	kilogram	base NIB-10C import			production	market for styrene butadiene rubber (SBR)
market for butadiene	0.752	kilogram	ecoinvent 3.3 cutoff		GLO	technosphere	butadiene
market for cyclohexane	0.01	kilogram	ecoinvent 3.3 cutoff		GLO	technosphere	cyclohexane
market for soap	0.0273	kilogram	ecoinvent 3.3 cutoff		GLO	technosphere	soap
market for sodium persulfate	0.00504	kilogram	ecoinvent 3.3 cutoff		GLO	technosphere	sodium persulfate
market for styrene	0.251	kilogram	ecoinvent 3.3 cutoff		GLO	technosphere	styrene
market for water, deionised, from tap water, at user	1.8	kilogram	ecoinvent 3.3 cutoff		RoW	technosphere	water, deionised, from tap water, at user
market group for electricity, medium voltage	0.55	kilowatt hour	ecoinvent 3.3 cutoff		ENTSO-E	technosphere	electricity, medium voltage
market group for heat, central or small-scale, natural gas	13.75	megajoule	ecoinvent 3.3 cutoff		RER	technosphere	heat, central or small-scale, natural gas
treatment of wastewater, unpolluted, capacity 5E9l/year	-1.8	cubic meter	ecoinvent 3.3 cutoff		RoW	technosphere	wastewater, unpolluted

## Sheet: pessimistic_NIB4C
cutoff	10
Database	pessimistic NIB-4C import
format	Excel spreadsheet
Activity	pessimistic NIB-4C cell
comment
location	GLO
production amount	1
unit	kWh
Exchanges
name	amount	unit	database	categories	location	type	reference product	Comment
pessimistic NIB-4C cell	1	kilowatt hour	pessimistic NIB-4C import		GLO	production
Anode paste	1.82771	kg	pessimistic NIB-4C import		GLO	technosphere
Cathode paste	5.28774	kg	pessimistic NIB-4C import		GLO	technosphere
Copper current collector	0	kg	pessimistic NIB-4C import		GLO	technosphere
Aluminum current collector	1.07514	kg	pessimistic NIB-4C import		GLO	technosphere
Electrolyte	1.46372	kg	pessimistic NIB-4C import		GLO	technosphere
Separator	0.410331	kg	pessimistic NIB-4C import		GLO	technosphere
Cell container	0.311277	kg	pessimistic NIB-4C import		GLO	technosphere		Assumption: cell container accounts for 3wt.% of battery cell
Water	59.73	unit	pessimistic NIB-4C import		GLO	technosphere
Energy	73.4009	kilowatt hour	pessimistic NIB-4C import		KR	technosphere
Activity	Water
comment
location	GLO
production amount	1
unit	unit
Exchanges
name	amount	unit	database	categories	location	type	reference product	Comment
market for water, decarbonised, at user	1	kilogram	ecoinvent 3.3 cutoff		GLO	technosphere	water, decarbonised, at user
Activity	Energy
comment
location	KR
production amount	1
unit	kilowatt hour
Exchanges
name	amount	unit	database	categories	location	type	reference product	Comment
market for electricity, medium voltage	0.5	kilowatt hour	ecoinvent 3.3 cutoff		KR	technosphere	electricity, medium voltage
heat production, natural gas, at industrial furnace low-NOx >100kW	1.8	megajoule	ecoinvent 3.3 cutoff		RoW	technosphere	heat, district or industrial, natural gas
Activity	Copper current collector
comment
location	GLO
production amount	1
unit	kg
Exchanges
name	amount	unit	database	categories	location	type	reference product	Comment
market for copper	1	kg	ecoinvent 3.3 cutoff		GLO	technosphere	copper
market for sheet rolling, copper	1	kg	ecoinvent 3.3 cutoff		GLO	technosphere	sheet rolling, copper
Activity	Anode paste
comment
location	GLO
production amount	1
unit	kg
Exchanges
name	amount	unit	database	categories	location	type	reference product	Comment
Hard carbon	0.93	kg	base NIB-10C import		GLO	technosphere
market for carboxymethyl cellulose, powder	0.021	kg	ecoinvent 3.3 cutoff		GLO	technosphere	carboxymethyl cellulose, powder
market for styrene butadiene rubber (SBR)	0.009	kg	base NIB-10C import			technosphere	market for styrene butadiene rubber (SBR)
market for carbon black	0.04	kg	ecoinvent 3.3 cutoff		GLO	technosphere	carbon black
Activity	Hard carbon
comment	Hard carbon from sugar precursor, inventory from: Peters et al.; Energy and Environmental Science 2016, 9, 1744
location	GLO
production amount	1
unit	kg
Exchanges
name	amount	unit	database	categories	location	type	reference product	Comment
Hard carbon	1	kg	base NIB-10C import		GLO	production
market for sugar beet	20	kg	ecoinvent 3.3 cutoff		RoW	technosphere	sugar beet
market group for electricity, medium voltage	0.107	kilowatt hour	ecoinvent 3.3 cutoff		ENTSO-E	technosphere	electricity, medium voltage
market for heat, central or small-scale, natural gas	9.52	MJ	ecoinvent 3.3 cutoff		Europe without Switzerland	technosphere	heat, central or small-scale, natural gas
market for water, deionised, from tap water, at user	0.178	kg	ecoinvent 3.3 cutoff		RoW	technosphere	water, deionised, from tap water, at user
market for chemicals, inorganic	0.267	kg	ecoinvent 3.3 cutoff		GLO	technosphere	chemical, inorganic
market for nitrogen, liquid	6.99	kg	ecoinvent 3.3 cutoff		RoW	technosphere	nitrogen, liquid
market for chemical factory, organics	4e-10	unit	ecoinvent 3.3 cutoff		GLO	technosphere	chemical factory, organics
Carbon dioxide, non-fossil	29.33	kg	biosphere3	air		biosphere					Emissions that cannot be considered because they are not in the database
Carbon monoxide, non-fossil	0.000353	kg	biosphere3	air		biosphere
Nitrogen oxides	0.00616	kg	biosphere3	air		biosphere					Dust
Sulfur dioxide	0.00117	kg	biosphere3	air		biosphere					Wastewater
NMVOC, non-methane volatile organic compounds, unspecified origin	0.00011	kg	biosphere3	air		biosphere					Solid waste
Hydrogen fluoride	8.89e-06	kg	biosphere3	air		biosphere
Hydrogen chloride	0.000508	kg	biosphere3	air		biosphere
Heat, waste	9.9	MJ	biosphere3	air		biosphere
Activity	Aluminum current collector
comment
location	GLO
production amount	1
unit	kg
Exchanges
name	amount	unit	database	categories	location	type	reference product	Comment
market for aluminium scrap, new	1	kg	ecoinvent 3.3 cutoff		RoW	technosphere	aluminium scrap, new
market for sheet rolling, aluminium	1	kg	ecoinvent 3.3 cutoff		GLO	technosphere	sheet rolling, aluminium
Activity	Cathode paste
comment
location	GLO
production amount	1
unit	kg
Exchanges
name	amount	unit	database	categories	location	type	reference product	Comment
market for polyvinylfluoride	0.03	kg	ecoinvent 3.3 cutoff		GLO	technosphere	polyvinylfluoride
market for carbon black	0.04	kg	ecoinvent 3.3 cutoff		GLO	technosphere	carbon black
Positive active material	0.93	kg	base NIB-10C import		GLO	technosphere
market for N-methyl-2-pyrrolidone	0.41	kg	ecoinvent 3.3 cutoff		GLO	technosphere	N-methyl-2-pyrrolidone
Activity	Positive active material
comment	Positive active material = Na(Ni1/3Co1/3Mn1/3)O2, it is assumed that the material can be synthesized in the same reaction as its Li analogue
location	GLO
production amount	1
unit	kg
Exchanges
name	amount	unit	database	categories	location	type	reference product	Comment
market for sodium hydroxide, without water, in 50% solution state	0.356	kg	ecoinvent 3.3 cutoff		GLO	technosphere	sodium hydroxide, without water, in 50% solution state
Ni1/3Co1/3Mn1/3(OH)2	0.814	kg	base NIB-10C import		GLO	technosphere
market for chemical factory, organics	4.6e-10	unit	ecoinvent 3.3 cutoff		GLO	technosphere	chemical factory, organics
market for heat, district or industrial, natural gas	0.55	MJ	ecoinvent 3.3 cutoff		RoW	technosphere	heat, district or industrial, natural gas
Activity	Ni1/3Co1/3Mn1/3(OH)2
comment	Inventory adapted from: Majeau-Bettez et al.; Environmental Science and Technology 2011, 45, 4548. Ellingsen et al.; J. Industrial Ecology 2014, 18 (1), 113
location	GLO
production amount	1
unit	kg
Exchanges
name	amount	unit	database	categories	location	type	reference product	Comment
market for nickel sulfate	0.57	kg	ecoinvent 3.3 cutoff		GLO	technosphere	nickel sulfate
Cobalt sulfate	0.57	kg	base NIB-10C import		GLO	technosphere
market for manganese sulfate	0.55	kg	ecoinvent 3.3 cutoff		GLO	technosphere	manganese sulfate
market for sodium hydroxide, without water, in 50% solution state	1.76	kg	ecoinvent 3.3 cutoff		GLO	technosphere	sodium hydroxide, without water, in 50% solution state
market for chemical factory, organics	4e-10	unit	ecoinvent 3.3 cutoff		GLO	technosphere	chemical factory, organics
Sulfate	1.6	kg	biosphere3	water		biosphere
Activity	Cobalt sulfate
comment	Inventory adapted from: Majeau-Bettez et al.; Environmental Science and Technology 2011, 45, 4548
location	GLO
production amount	1
unit	kg
Exchanges
name	amount	unit	database	categories	location	type	reference product	Comment
market for cobalt	0.3802	kg	ecoinvent 3.3 cutoff		GLO	technosphere	cobalt
market for carbon monoxide	-0.11	kg	ecoinvent 3.3 cutoff		RER	technosphere	carbon monoxide
market for hydrogen, liquid	-0.0079	kg	ecoinvent 3.3 cutoff		RER	technosphere	hydrogen, liquid
market for blasting	-0.11	kg	ecoinvent 3.3 cutoff		GLO	technosphere	blasting
market for heat, district or industrial, natural gas	-0.76	MJ	ecoinvent 3.3 cutoff		RoW	technosphere	heat, district or industrial, natural gas
Activity	Electrolyte
comment
location	GLO
production amount	1
unit	kg
Exchanges
name	amount	unit	database	categories	location	type	reference product	Comment
Sodium hexafluorophosphate	0.14	kg	base NIB-10C import		GLO	technosphere		1M solution
market for ethylene carbonate	0.86	kg	ecoinvent 3.3 cutoff		GLO	technosphere	ethylene carbonate
Activity	Sodium hexafluorophosphate
comment	Inventory from: Peters et al.; Energy and Environmental Science 2016, 9, 1744
location	GLO
production amount	1
unit	kg
Exchanges
name	amount	unit	database	categories	location	type	reference product	Comment
Sodium hexafluorophosphate	1	kg	base NIB-10C import		GLO	production
market for sodium fluoride	0.319	kg	ecoinvent 3.3 cutoff		GLO	technosphere	sodium fluoride
market for phosphorus pentachloride	1.98	kg	ecoinvent 3.3 cutoff		GLO	technosphere	phosphorus pentachloride
market for hydrogen fluoride	4.04	kg	ecoinvent 3.3 cutoff		GLO	technosphere	hydrogen fluoride				Emissions that cannot be considered because they are not in the database
market for nitrogen, liquid	0.00125	kg	ecoinvent 3.3 cutoff		RoW	technosphere	nitrogen, liquid
market for lime, hydrated, packed	7.44	kg	ecoinvent 3.3 cutoff		GLO	technosphere	lime, hydrated, packed				Disposal of salts
market group for electricity, medium voltage	0.541	kilowatt hour	ecoinvent 3.3 cutoff		ENTSO-E	technosphere	electricity, medium voltage				Wastewater
market for chemical factory, organics	4e-10	unit	ecoinvent 3.3 cutoff		GLO	technosphere	chemical factory, organics				NaF recycled
Phosphorus trichloride	0.263	kg	biosphere3	air		biosphere
Heat, waste	1.95	MJ	biosphere3	air		biosphere
Activity	Separator
comment
location	GLO
production amount	1
unit	kg
Exchanges
name	amount	unit	database	categories	location	type	reference product	Comment
market for polypropylene, granulate	0.5	kg	ecoinvent 3.3 cutoff		GLO	technosphere	polypropylene, granulate
market for polyethylene, low density, granulate	0.5	kg	ecoinvent 3.3 cutoff		GLO	technosphere	polyethylene, low density, granulate
market for extrusion, plastic film	1	kg	ecoinvent 3.3 cutoff		GLO	technosphere	extrusion, plastic film
Activity	Cell container
comment
location	GLO
production amount	1
unit	kg
Exchanges
name	amount	unit	database	categories	location	type	reference product	Comment
Tab Aluminum	0.22	kg	base NIB-10C import		GLO	technosphere
Tab Copper	0.38	kg	base NIB-10C import		GLO	technosphere
Multilayer pouch	0.4	kg	base NIB-10C import		GLO	technosphere
Activity	Tab Aluminum
comment
location	GLO
production amount	1
unit	kg
Exchanges
name	amount	unit	database	categories	location	type	reference product	Comment
aluminium ingot, primary, to aluminium, wrought alloy market	1	kg	ecoinvent 3.3 cutoff		GLO	technosphere	aluminium, wrought alloy
market for sheet rolling, aluminium	1	kg	ecoinvent 3.3 cutoff		GLO	technosphere	sheet rolling, aluminium
market for aluminium casting facility	1.5e-10	unit	ecoinvent 3.3 cutoff		GLO	technosphere	aluminium casting facility
Activity	Tab Copper
comment
location	GLO
production amount	1
unit	kg
Exchanges
name	amount	unit	database	categories	location	type	reference product	Comment
market for copper	1	kg	ecoinvent 3.3 cutoff		GLO	technosphere	copper
market for sheet rolling, copper	1	kg	ecoinvent 3.3 cutoff		GLO	technosphere	sheet rolling, copper
market for metal working factory	4.6e-10	unit	ecoinvent 3.3 cutoff		GLO	technosphere	metal working factory
Activity	Multilayer pouch
comment
location	GLO
production amount	1
unit	kg
Exchanges
name	amount	unit	database	categories	location	type	reference product	Comment
aluminium ingot, primary, to aluminium, wrought alloy market	0.5	kg	ecoinvent 3.3 cutoff		GLO	technosphere	aluminium, wrought alloy
market for polyethylene terephthalate, granulate, amorphous	0.078	kg	ecoinvent 3.3 cutoff		GLO	technosphere	polyethylene terephthalate, granulate, amorphous
market for nylon 6	0.08	kg	ecoinvent 3.3 cutoff		GLO	technosphere	nylon 6
market for polypropylene, granulate	0.32	kg	ecoinvent 3.3 cutoff		GLO	technosphere	polypropylene, granulate
market for packaging film, low density polyethylene	0.025	kg	ecoinvent 3.3 cutoff		GLO	technosphere	packaging film, low density polyethylene
market for injection moulding	0.47	kg	ecoinvent 3.3 cutoff		GLO	technosphere	injection moulding
market for sheet rolling, aluminium	0.5	kg	ecoinvent 3.3 cutoff		GLO	technosphere	sheet rolling, aluminium
market for aluminium casting facility	7.7e-11	unit	ecoinvent 3.3 cutoff		GLO	technosphere	aluminium casting facility
market for plastic processing factory	3.5e-10	unit	ecoinvent 3.3 cutoff		GLO	technosphere	plastic processing factory
Activity	market for styrene butadiene rubber (SBR)
production amount	1
reference product	market for styrene butadiene rubber (SBR)
type	process
unit	kilogram
Exchanges
name	amount	unit	database	categories	location	type	reference product
Heat, waste	15.73	megajoule	biosphere3	air		biosphere
NMVOC, non-methane volatile organic compounds, unspecified origin	0.0144	kilogram	biosphere3	air		biosphere
Water, cooling, unspecified natural origin	0.25	cubic meter	biosphere3	natural resource::in water		biosphere
market for styrene butadiene rubber (SBR)	1	kilogram	base NIB-10C import			production	market for styrene butadiene rubber (SBR)
market for butadiene	0.752	kilogram	ecoinvent 3.3 cutoff		GLO	technosphere	butadiene
market for cyclohexane	0.01	kilogram	ecoinvent 3.3 cutoff		GLO	technosphere	cyclohexane
market for soap	0.0273	kilogram	ecoinvent 3.3 cutoff		GLO	technosphere	soap
market for sodium persulfate	0.00504	kilogram	ecoinvent 3.3 cutoff		GLO	technosphere	sodium persulfate
market for styrene	0.251	kilogram	ecoinvent 3.3 cutoff		GLO	technosphere	styrene
market for water, deionised, from tap water, at user	1.8	kilogram	ecoinvent 3.3 cutoff		RoW	technosphere	water, deionised, from tap water, at user
market group for electricity, medium voltage	0.55	kilowatt hour	ecoinvent 3.3 cutoff		ENTSO-E	technosphere	electricity, medium voltage
market group for heat, central or small-scale, natural gas	13.75	megajoule	ecoinvent 3.3 cutoff		RER	technosphere	heat, central or small-scale, natural gas
treatment of wastewater, unpolluted, capacity 5E9l/year	-1.8	cubic meter	ecoinvent 3.3 cutoff		RoW	technosphere	wastewater, unpolluted

## Sheet: pessimistic_NIB10C
cutoff	10
Database	pessimistic NIB-10C import
format	Excel spreadsheet
Activity	pessimistic NIB-10C cell
comment
location	GLO
production amount	1
unit	kWh
Exchanges
name	amount	unit	database	categories	location	type	reference product	Comment
pessimistic NIB-10C cell	1	kilowatt hour	pessimistic NIB-10C import		GLO	production
Anode paste	2.09011	kg	pessimistic NIB-10C import		GLO	technosphere
Cathode paste	6.04774	kg	pessimistic NIB-10C import		GLO	technosphere
Copper current collector	0	kg	pessimistic NIB-10C import		GLO	technosphere
Aluminum current collector	1.67445	kg	pessimistic NIB-10C import		GLO	technosphere
Electrolyte	2.25261	kg	pessimistic NIB-10C import		GLO	technosphere
Separator	0.639059	kg	pessimistic NIB-10C import		GLO	technosphere
Cell container	0.392906	kg	pessimistic NIB-10C import		GLO	technosphere		Assumption: cell container accounts for 3wt.% of battery cell
Water	87.7658	unit	pessimistic NIB-10C import		GLO	technosphere
Energy	107.853	kilowatt hour	pessimistic NIB-10C import		KR	technosphere
Activity	Water
comment
location	GLO
production amount	1
unit	unit
Exchanges
name	amount	unit	database	categories	location	type	reference product	Comment
market for water, decarbonised, at user	1	kilogram	ecoinvent 3.3 cutoff		GLO	technosphere	water, decarbonised, at user
Activity	Energy
comment
location	KR
production amount	1
unit	kilowatt hour
Exchanges
name	amount	unit	database	categories	location	type	reference product	Comment
market for electricity, medium voltage	0.5	kilowatt hour	ecoinvent 3.3 cutoff		KR	technosphere	electricity, medium voltage
heat production, natural gas, at industrial furnace low-NOx >100kW	1.8	megajoule	ecoinvent 3.3 cutoff		RoW	technosphere	heat, district or industrial, natural gas
Activity	Copper current collector
comment
location	GLO
production amount	1
unit	kg
Exchanges
name	amount	unit	database	categories	location	type	reference product	Comment
market for copper	1	kg	ecoinvent 3.3 cutoff		GLO	technosphere	copper
market for sheet rolling, copper	1	kg	ecoinvent 3.3 cutoff		GLO	technosphere	sheet rolling, copper
Activity	Anode paste
comment
location	GLO
production amount	1
unit	kg
Exchanges
name	amount	unit	database	categories	location	type	reference product	Comment
Hard carbon	0.93	kg	base NIB-10C import		GLO	technosphere
market for carboxymethyl cellulose, powder	0.021	kg	ecoinvent 3.3 cutoff		GLO	technosphere	carboxymethyl cellulose, powder
market for styrene butadiene rubber (SBR)	0.009	kg	base NIB-10C import			technosphere	market for styrene butadiene rubber (SBR)
market for carbon black	0.04	kg	ecoinvent 3.3 cutoff		GLO	technosphere	carbon black
Activity	Hard carbon
comment	Hard carbon from sugar precursor, inventory from: Peters et al.; Energy and Environmental Science 2016, 9, 1744
location	GLO
production amount	1
unit	kg
Exchanges
name	amount	unit	database	categories	location	type	reference product	Comment
Hard carbon	1	kg	base NIB-10C import		GLO	production
market for sugar beet	20	kg	ecoinvent 3.3 cutoff		RoW	technosphere	sugar beet
market group for electricity, medium voltage	0.107	kilowatt hour	ecoinvent 3.3 cutoff		ENTSO-E	technosphere	electricity, medium voltage
market for heat, central or small-scale, natural gas	9.52	MJ	ecoinvent 3.3 cutoff		Europe without Switzerland	technosphere	heat, central or small-scale, natural gas
market for water, deionised, from tap water, at user	0.178	kg	ecoinvent 3.3 cutoff		RoW	technosphere	water, deionised, from tap water, at user
market for chemicals, inorganic	0.267	kg	ecoinvent 3.3 cutoff		GLO	technosphere	chemical, inorganic
market for nitrogen, liquid	6.99	kg	ecoinvent 3.3 cutoff		RoW	technosphere	nitrogen, liquid
market for chemical factory, organics	4e-10	unit	ecoinvent 3.3 cutoff		GLO	technosphere	chemical factory, organics
Carbon dioxide, non-fossil	29.33	kg	biosphere3	air		biosphere					Emissions that cannot be considered because they are not in the database
Carbon monoxide, non-fossil	0.000353	kg	biosphere3	air		biosphere
Nitrogen oxides	0.00616	kg	biosphere3	air		biosphere					Dust
Sulfur dioxide	0.00117	kg	biosphere3	air		biosphere					Wastewater
NMVOC, non-methane volatile organic compounds, unspecified origin	0.00011	kg	biosphere3	air		biosphere					Solid waste
Hydrogen fluoride	8.89e-06	kg	biosphere3	air		biosphere
Hydrogen chloride	0.000508	kg	biosphere3	air		biosphere
Heat, waste	9.9	MJ	biosphere3	air		biosphere
Activity	Aluminum current collector
comment
location	GLO
production amount	1
unit	kg
Exchanges
name	amount	unit	database	categories	location	type	reference product	Comment
market for aluminium scrap, new	1	kg	ecoinvent 3.3 cutoff		RoW	technosphere	aluminium scrap, new
market for sheet rolling, aluminium	1	kg	ecoinvent 3.3 cutoff		GLO	technosphere	sheet rolling, aluminium
Activity	Cathode paste
comment
location	GLO
production amount	1
unit	kg
Exchanges
name	amount	unit	database	categories	location	type	reference product	Comment
market for polyvinylfluoride	0.03	kg	ecoinvent 3.3 cutoff		GLO	technosphere	polyvinylfluoride
market for carbon black	0.04	kg	ecoinvent 3.3 cutoff		GLO	technosphere	carbon black
Positive active material	0.93	kg	base NIB-10C import		GLO	technosphere
market for N-methyl-2-pyrrolidone	0.41	kg	ecoinvent 3.3 cutoff		GLO	technosphere	N-methyl-2-pyrrolidone
Activity	Positive active material
comment	Positive active material = Na(Ni1/3Co1/3Mn1/3)O2, it is assumed that the material can be synthesized in the same reaction as its Li analogue
location	GLO
production amount	1
unit	kg
Exchanges
name	amount	unit	database	categories	location	type	reference product	Comment
market for sodium hydroxide, without water, in 50% solution state	0.356	kg	ecoinvent 3.3 cutoff		GLO	technosphere	sodium hydroxide, without water, in 50% solution state
Ni1/3Co1/3Mn1/3(OH)2	0.814	kg	base NIB-10C import		GLO	technosphere
market for chemical factory, organics	4.6e-10	unit	ecoinvent 3.3 cutoff		GLO	technosphere	chemical factory, organics
market for heat, district or industrial, natural gas	0.55	MJ	ecoinvent 3.3 cutoff		RoW	technosphere	heat, district or industrial, natural gas
Activity	Ni1/3Co1/3Mn1/3(OH)2
comment	Inventory adapted from: Majeau-Bettez et al.; Environmental Science and Technology 2011, 45, 4548. Ellingsen et al.; J. Industrial Ecology 2014, 18 (1), 113
location	GLO
production amount	1
unit	kg
Exchanges
name	amount	unit	database	categories	location	type	reference product	Comment
market for nickel sulfate	0.57	kg	ecoinvent 3.3 cutoff		GLO	technosphere	nickel sulfate
Cobalt sulfate	0.57	kg	base NIB-10C import		GLO	technosphere
market for manganese sulfate	0.55	kg	ecoinvent 3.3 cutoff		GLO	technosphere	manganese sulfate
market for sodium hydroxide, without water, in 50% solution state	1.76	kg	ecoinvent 3.3 cutoff		GLO	technosphere	sodium hydroxide, without water, in 50% solution state
market for chemical factory, organics	4e-10	unit	ecoinvent 3.3 cutoff		GLO	technosphere	chemical factory, organics
Sulfate	1.6	kg	biosphere3	water		biosphere
Activity	Cobalt sulfate
comment	Inventory adapted from: Majeau-Bettez et al.; Environmental Science and Technology 2011, 45, 4548
location	GLO
production amount	1
unit	kg
Exchanges
name	amount	unit	database	categories	location	type	reference product	Comment
market for cobalt	0.3802	kg	ecoinvent 3.3 cutoff		GLO	technosphere	cobalt
market for carbon monoxide	-0.11	kg	ecoinvent 3.3 cutoff		RER	technosphere	carbon monoxide
market for hydrogen, liquid	-0.0079	kg	ecoinvent 3.3 cutoff		RER	technosphere	hydrogen, liquid
market for blasting	-0.11	kg	ecoinvent 3.3 cutoff		GLO	technosphere	blasting
market for heat, district or industrial, natural gas	-0.76	MJ	ecoinvent 3.3 cutoff		RoW	technosphere	heat, district or industrial, natural gas
Activity	Electrolyte
comment
location	GLO
production amount	1
unit	kg
Exchanges
name	amount	unit	database	categories	location	type	reference product	Comment
Sodium hexafluorophosphate	0.14	kg	base NIB-10C import		GLO	technosphere		1M solution
market for ethylene carbonate	0.86	kg	ecoinvent 3.3 cutoff		GLO	technosphere	ethylene carbonate
Activity	Sodium hexafluorophosphate
comment	Inventory from: Peters et al.; Energy and Environmental Science 2016, 9, 1744
location	GLO
production amount	1
unit	kg
Exchanges
name	amount	unit	database	categories	location	type	reference product	Comment
Sodium hexafluorophosphate	1	kg	base NIB-10C import		GLO	production
market for sodium fluoride	0.319	kg	ecoinvent 3.3 cutoff		GLO	technosphere	sodium fluoride
market for phosphorus pentachloride	1.98	kg	ecoinvent 3.3 cutoff		GLO	technosphere	phosphorus pentachloride
market for hydrogen fluoride	4.04	kg	ecoinvent 3.3 cutoff		GLO	technosphere	hydrogen fluoride				Emissions that cannot be considered because they are not in the database
market for nitrogen, liquid	0.00125	kg	ecoinvent 3.3 cutoff		RoW	technosphere	nitrogen, liquid
market for lime, hydrated, packed	7.44	kg	ecoinvent 3.3 cutoff		GLO	technosphere	lime, hydrated, packed				Disposal of salts
market group for electricity, medium voltage	0.541	kilowatt hour	ecoinvent 3.3 cutoff		ENTSO-E	technosphere	electricity, medium voltage				Wastewater
market for chemical factory, organics	4e-10	unit	ecoinvent 3.3 cutoff		GLO	technosphere	chemical factory, organics				NaF recycled
Phosphorus trichloride	0.263	kg	biosphere3	air		biosphere
Heat, waste	1.95	MJ	biosphere3	air		biosphere
Activity	Separator
comment
location	GLO
production amount	1
unit	kg
Exchanges
name	amount	unit	database	categories	location	type	reference product	Comment
market for polypropylene, granulate	0.5	kg	ecoinvent 3.3 cutoff		GLO	technosphere	polypropylene, granulate
market for polyethylene, low density, granulate	0.5	kg	ecoinvent 3.3 cutoff		GLO	technosphere	polyethylene, low density, granulate
market for extrusion, plastic film	1	kg	ecoinvent 3.3 cutoff		GLO	technosphere	extrusion, plastic film
Activity	Cell container
comment
location	GLO
production amount	1
unit	kg
Exchanges
name	amount	unit	database	categories	location	type	reference product	Comment
Tab Aluminum	0.22	kg	base NIB-10C import		GLO	technosphere
Tab Copper	0.38	kg	base NIB-10C import		GLO	technosphere
Multilayer pouch	0.4	kg	base NIB-10C import		GLO	technosphere
Activity	Tab Aluminum
comment
location	GLO
production amount	1
unit	kg
Exchanges
name	amount	unit	database	categories	location	type	reference product	Comment
aluminium ingot, primary, to aluminium, wrought alloy market	1	kg	ecoinvent 3.3 cutoff		GLO	technosphere	aluminium, wrought alloy
market for sheet rolling, aluminium	1	kg	ecoinvent 3.3 cutoff		GLO	technosphere	sheet rolling, aluminium
market for aluminium casting facility	1.5e-10	unit	ecoinvent 3.3 cutoff		GLO	technosphere	aluminium casting facility
Activity	Tab Copper
comment
location	GLO
production amount	1
unit	kg
Exchanges
name	amount	unit	database	categories	location	type	reference product	Comment
market for copper	1	kg	ecoinvent 3.3 cutoff		GLO	technosphere	copper
market for sheet rolling, copper	1	kg	ecoinvent 3.3 cutoff		GLO	technosphere	sheet rolling, copper
market for metal working factory	4.6e-10	unit	ecoinvent 3.3 cutoff		GLO	technosphere	metal working factory
Activity	Multilayer pouch
comment
location	GLO
production amount	1
unit	kg
Exchanges
name	amount	unit	database	categories	location	type	reference product	Comment
aluminium ingot, primary, to aluminium, wrought alloy market	0.5	kg	ecoinvent 3.3 cutoff		GLO	technosphere	aluminium, wrought alloy
market for polyethylene terephthalate, granulate, amorphous	0.078	kg	ecoinvent 3.3 cutoff		GLO	technosphere	polyethylene terephthalate, granulate, amorphous
market for nylon 6	0.08	kg	ecoinvent 3.3 cutoff		GLO	technosphere	nylon 6
market for polypropylene, granulate	0.32	kg	ecoinvent 3.3 cutoff		GLO	technosphere	polypropylene, granulate
market for packaging film, low density polyethylene	0.025	kg	ecoinvent 3.3 cutoff		GLO	technosphere	packaging film, low density polyethylene
market for injection moulding	0.47	kg	ecoinvent 3.3 cutoff		GLO	technosphere	injection moulding
market for sheet rolling, aluminium	0.5	kg	ecoinvent 3.3 cutoff		GLO	technosphere	sheet rolling, aluminium
market for aluminium casting facility	7.7e-11	unit	ecoinvent 3.3 cutoff		GLO	technosphere	aluminium casting facility
market for plastic processing factory	3.5e-10	unit	ecoinvent 3.3 cutoff		GLO	technosphere	plastic processing factory
Activity	market for styrene butadiene rubber (SBR)
production amount	1
reference product	market for styrene butadiene rubber (SBR)
type	process
unit	kilogram
Exchanges
name	amount	unit	database	categories	location	type	reference product
Heat, waste	15.73	megajoule	biosphere3	air		biosphere
NMVOC, non-methane volatile organic compounds, unspecified origin	0.0144	kilogram	biosphere3	air		biosphere
Water, cooling, unspecified natural origin	0.25	cubic meter	biosphere3	natural resource::in water		biosphere
market for styrene butadiene rubber (SBR)	1	kilogram	base NIB-10C import			production	market for styrene butadiene rubber (SBR)
market for butadiene	0.752	kilogram	ecoinvent 3.3 cutoff		GLO	technosphere	butadiene
market for cyclohexane	0.01	kilogram	ecoinvent 3.3 cutoff		GLO	technosphere	cyclohexane
market for soap	0.0273	kilogram	ecoinvent 3.3 cutoff		GLO	technosphere	soap
market for sodium persulfate	0.00504	kilogram	ecoinvent 3.3 cutoff		GLO	technosphere	sodium persulfate
market for styrene	0.251	kilogram	ecoinvent 3.3 cutoff		GLO	technosphere	styrene
market for water, deionised, from tap water, at user	1.8	kilogram	ecoinvent 3.3 cutoff		RoW	technosphere	water, deionised, from tap water, at user
market group for electricity, medium voltage	0.55	kilowatt hour	ecoinvent 3.3 cutoff		ENTSO-E	technosphere	electricity, medium voltage
market group for heat, central or small-scale, natural gas	13.75	megajoule	ecoinvent 3.3 cutoff		RER	technosphere	heat, central or small-scale, natural gas
treatment of wastewater, unpolluted, capacity 5E9l/year	-1.8	cubic meter	ecoinvent 3.3 cutoff		RoW	technosphere	wastewater, unpolluted

## Sheet: optimistic_NIB025C
cutoff	10
Database	optimistic NIB-025C import
format	Excel spreadsheet
Activity	optimistic NIB-025C cell
comment
location	GLO
production amount	1
unit	kWh
Exchanges
name	amount	unit	database	categories	location	type	reference product	Comment
optimistic NIB-025C cell	1	kilowatt hour	optimistic NIB-025C import		GLO	production
Anode paste	1.62155	kg	optimistic NIB-025C import		GLO	technosphere
Cathode paste	4.69158	kg	optimistic NIB-025C import		GLO	technosphere
Copper current collector	0	kg	optimistic NIB-025C import		GLO	technosphere
Aluminum current collector	0.332576	kg	optimistic NIB-025C import		GLO	technosphere
Electrolyte	0.612184	kg	optimistic NIB-025C import		GLO	technosphere
Separator	0.126929	kg	optimistic NIB-025C import		GLO	technosphere
Cell container	0.228397	kg	optimistic NIB-025C import		GLO	technosphere		Assumption: cell container accounts for 3wt.% of battery cell
Water	24.9927	unit	optimistic NIB-025C import		GLO	technosphere
Energy	30.713	kilowatt hour	optimistic NIB-025C import		KR	technosphere
Activity	Water
comment
location	GLO
production amount	1
unit	unit
Exchanges
name	amount	unit	database	categories	location	type	reference product	Comment
market for water, decarbonised, at user	1	kilogram	ecoinvent 3.3 cutoff		GLO	technosphere	water, decarbonised, at user
Activity	Energy
comment
location	KR
production amount	1
unit	kilowatt hour
Exchanges
name	amount	unit	database	categories	location	type	reference product	Comment
market for electricity, medium voltage	0.5	kilowatt hour	ecoinvent 3.3 cutoff		KR	technosphere	electricity, medium voltage
heat production, natural gas, at industrial furnace low-NOx >100kW	1.8	megajoule	ecoinvent 3.3 cutoff		RoW	technosphere	heat, district or industrial, natural gas
Activity	Copper current collector
comment
location	GLO
production amount	1
unit	kg
Exchanges
name	amount	unit	database	categories	location	type	reference product	Comment
market for copper	1	kg	ecoinvent 3.3 cutoff		GLO	technosphere	copper
market for sheet rolling, copper	1	kg	ecoinvent 3.3 cutoff		GLO	technosphere	sheet rolling, copper
Activity	Anode paste
comment
location	GLO
production amount	1
unit	kg
Exchanges
name	amount	unit	database	categories	location	type	reference product	Comment
Hard carbon	0.93	kg	base NIB-10C import		GLO	technosphere
market for carboxymethyl cellulose, powder	0.021	kg	ecoinvent 3.3 cutoff		GLO	technosphere	carboxymethyl cellulose, powder
market for styrene butadiene rubber (SBR)	0.009	kg	base NIB-10C import			technosphere	market for styrene butadiene rubber (SBR)
market for carbon black	0.04	kg	ecoinvent 3.3 cutoff		GLO	technosphere	carbon black
Activity	Hard carbon
comment	Hard carbon from sugar precursor, inventory from: Peters et al.; Energy and Environmental Science 2016, 9, 1744
location	GLO
production amount	1
unit	kg
Exchanges
name	amount	unit	database	categories	location	type	reference product	Comment
Hard carbon	1	kg	base NIB-10C import		GLO	production
market for sugar beet	20	kg	ecoinvent 3.3 cutoff		RoW	technosphere	sugar beet
market group for electricity, medium voltage	0.107	kilowatt hour	ecoinvent 3.3 cutoff		ENTSO-E	technosphere	electricity, medium voltage
market for heat, central or small-scale, natural gas	9.52	MJ	ecoinvent 3.3 cutoff		Europe without Switzerland	technosphere	heat, central or small-scale, natural gas
market for water, deionised, from tap water, at user	0.178	kg	ecoinvent 3.3 cutoff		RoW	technosphere	water, deionised, from tap water, at user
market for chemicals, inorganic	0.267	kg	ecoinvent 3.3 cutoff		GLO	technosphere	chemical, inorganic
market for nitrogen, liquid	6.99	kg	ecoinvent 3.3 cutoff		RoW	technosphere	nitrogen, liquid
market for chemical factory, organics	4e-10	unit	ecoinvent 3.3 cutoff		GLO	technosphere	chemical factory, organics
Carbon dioxide, non-fossil	29.33	kg	biosphere3	air		biosphere					Emissions that cannot be considered because they are not in the database
Carbon monoxide, non-fossil	0.000353	kg	biosphere3	air		biosphere
Nitrogen oxides	0.00616	kg	biosphere3	air		biosphere					Dust
Sulfur dioxide	0.00117	kg	biosphere3	air		biosphere					Wastewater
NMVOC, non-methane volatile organic compounds, unspecified origin	0.00011	kg	biosphere3	air		biosphere					Solid waste
Hydrogen fluoride	8.89e-06	kg	biosphere3	air		biosphere
Hydrogen chloride	0.000508	kg	biosphere3	air		biosphere
Heat, waste	9.9	MJ	biosphere3	air		biosphere
Activity	Aluminum current collector
comment
location	GLO
production amount	1
unit	kg
Exchanges
name	amount	unit	database	categories	location	type	reference product	Comment
market for aluminium scrap, new	1	kg	ecoinvent 3.3 cutoff		RoW	technosphere	aluminium scrap, new
market for sheet rolling, aluminium	1	kg	ecoinvent 3.3 cutoff		GLO	technosphere	sheet rolling, aluminium
Activity	Cathode paste
comment
location	GLO
production amount	1
unit	kg
Exchanges
name	amount	unit	database	categories	location	type	reference product	Comment
market for polyvinylfluoride	0.03	kg	ecoinvent 3.3 cutoff		GLO	technosphere	polyvinylfluoride
market for carbon black	0.04	kg	ecoinvent 3.3 cutoff		GLO	technosphere	carbon black
Positive active material	0.93	kg	base NIB-10C import		GLO	technosphere
market for N-methyl-2-pyrrolidone	0.41	kg	ecoinvent 3.3 cutoff		GLO	technosphere	N-methyl-2-pyrrolidone
Activity	Positive active material
comment	Positive active material = Na(Ni1/3Co1/3Mn1/3)O2, it is assumed that the material can be synthesized in the same reaction as its Li analogue
location	GLO
production amount	1
unit	kg
Exchanges
name	amount	unit	database	categories	location	type	reference product	Comment
market for sodium hydroxide, without water, in 50% solution state	0.356	kg	ecoinvent 3.3 cutoff		GLO	technosphere	sodium hydroxide, without water, in 50% solution state
Ni1/3Co1/3Mn1/3(OH)2	0.814	kg	base NIB-10C import		GLO	technosphere
market for chemical factory, organics	4.6e-10	unit	ecoinvent 3.3 cutoff		GLO	technosphere	chemical factory, organics
market for heat, district or industrial, natural gas	0.55	MJ	ecoinvent 3.3 cutoff		RoW	technosphere	heat, district or industrial, natural gas
Activity	Ni1/3Co1/3Mn1/3(OH)2
comment	Inventory adapted from: Majeau-Bettez et al.; Environmental Science and Technology 2011, 45, 4548. Ellingsen et al.; J. Industrial Ecology 2014, 18 (1), 113
location	GLO
production amount	1
unit	kg
Exchanges
name	amount	unit	database	categories	location	type	reference product	Comment
market for nickel sulfate	0.57	kg	ecoinvent 3.3 cutoff		GLO	technosphere	nickel sulfate
Cobalt sulfate	0.57	kg	base NIB-10C import		GLO	technosphere
market for manganese sulfate	0.55	kg	ecoinvent 3.3 cutoff		GLO	technosphere	manganese sulfate
market for sodium hydroxide, without water, in 50% solution state	1.76	kg	ecoinvent 3.3 cutoff		GLO	technosphere	sodium hydroxide, without water, in 50% solution state
market for chemical factory, organics	4e-10	unit	ecoinvent 3.3 cutoff		GLO	technosphere	chemical factory, organics
Sulfate	1.6	kg	biosphere3	water		biosphere
Activity	Cobalt sulfate
comment	Inventory adapted from: Majeau-Bettez et al.; Environmental Science and Technology 2011, 45, 4548
location	GLO
production amount	1
unit	kg
Exchanges
name	amount	unit	database	categories	location	type	reference product	Comment
market for cobalt	0.3802	kg	ecoinvent 3.3 cutoff		GLO	technosphere	cobalt
market for carbon monoxide	-0.11	kg	ecoinvent 3.3 cutoff		RER	technosphere	carbon monoxide
market for hydrogen, liquid	-0.0079	kg	ecoinvent 3.3 cutoff		RER	technosphere	hydrogen, liquid
market for blasting	-0.11	kg	ecoinvent 3.3 cutoff		GLO	technosphere	blasting
market for heat, district or industrial, natural gas	-0.76	MJ	ecoinvent 3.3 cutoff		RoW	technosphere	heat, district or industrial, natural gas
Activity	Electrolyte
comment
location	GLO
production amount	1
unit	kg
Exchanges
name	amount	unit	database	categories	location	type	reference product	Comment
Sodium hexafluorophosphate	0.14	kg	base NIB-10C import		GLO	technosphere		1M solution
market for ethylene carbonate	0.86	kg	ecoinvent 3.3 cutoff		GLO	technosphere	ethylene carbonate
Activity	Sodium hexafluorophosphate
comment	Inventory from: Peters et al.; Energy and Environmental Science 2016, 9, 1744
location	GLO
production amount	1
unit	kg
Exchanges
name	amount	unit	database	categories	location	type	reference product	Comment
Sodium hexafluorophosphate	1	kg	base NIB-10C import		GLO	production
market for sodium fluoride	0.319	kg	ecoinvent 3.3 cutoff		GLO	technosphere	sodium fluoride
market for phosphorus pentachloride	1.98	kg	ecoinvent 3.3 cutoff		GLO	technosphere	phosphorus pentachloride
market for hydrogen fluoride	4.04	kg	ecoinvent 3.3 cutoff		GLO	technosphere	hydrogen fluoride				Emissions that cannot be considered because they are not in the database
market for nitrogen, liquid	0.00125	kg	ecoinvent 3.3 cutoff		RoW	technosphere	nitrogen, liquid
market for lime, hydrated, packed	7.44	kg	ecoinvent 3.3 cutoff		GLO	technosphere	lime, hydrated, packed				Disposal of salts
market group for electricity, medium voltage	0.541	kilowatt hour	ecoinvent 3.3 cutoff		ENTSO-E	technosphere	electricity, medium voltage				Wastewater
market for chemical factory, organics	4e-10	unit	ecoinvent 3.3 cutoff		GLO	technosphere	chemical factory, organics				NaF recycled
Phosphorus trichloride	0.263	kg	biosphere3	air		biosphere
Heat, waste	1.95	MJ	biosphere3	air		biosphere
Activity	Separator
comment
location	GLO
production amount	1
unit	kg
Exchanges
name	amount	unit	database	categories	location	type	reference product	Comment
market for polypropylene, granulate	0.5	kg	ecoinvent 3.3 cutoff		GLO	technosphere	polypropylene, granulate
market for polyethylene, low density, granulate	0.5	kg	ecoinvent 3.3 cutoff		GLO	technosphere	polyethylene, low density, granulate
market for extrusion, plastic film	1	kg	ecoinvent 3.3 cutoff		GLO	technosphere	extrusion, plastic film
Activity	Cell container
comment
location	GLO
production amount	1
unit	kg
Exchanges
name	amount	unit	database	categories	location	type	reference product	Comment
Tab Aluminum	0.22	kg	base NIB-10C import		GLO	technosphere
Tab Copper	0.38	kg	base NIB-10C import		GLO	technosphere
Multilayer pouch	0.4	kg	base NIB-10C import		GLO	technosphere
Activity	Tab Aluminum
comment
location	GLO
production amount	1
unit	kg
Exchanges
name	amount	unit	database	categories	location	type	reference product	Comment
aluminium ingot, primary, to aluminium, wrought alloy market	1	kg	ecoinvent 3.3 cutoff		GLO	technosphere	aluminium, wrought alloy
market for sheet rolling, aluminium	1	kg	ecoinvent 3.3 cutoff		GLO	technosphere	sheet rolling, aluminium
market for aluminium casting facility	1.5e-10	unit	ecoinvent 3.3 cutoff		GLO	technosphere	aluminium casting facility
Activity	Tab Copper
comment
location	GLO
production amount	1
unit	kg
Exchanges
name	amount	unit	database	categories	location	type	reference product	Comment
market for copper	1	kg	ecoinvent 3.3 cutoff		GLO	technosphere	copper
market for sheet rolling, copper	1	kg	ecoinvent 3.3 cutoff		GLO	technosphere	sheet rolling, copper
market for metal working factory	4.6e-10	unit	ecoinvent 3.3 cutoff		GLO	technosphere	metal working factory
Activity	Multilayer pouch
comment
location	GLO
production amount	1
unit	kg
Exchanges
name	amount	unit	database	categories	location	type	reference product	Comment
aluminium ingot, primary, to aluminium, wrought alloy market	0.5	kg	ecoinvent 3.3 cutoff		GLO	technosphere	aluminium, wrought alloy
market for polyethylene terephthalate, granulate, amorphous	0.078	kg	ecoinvent 3.3 cutoff		GLO	technosphere	polyethylene terephthalate, granulate, amorphous
market for nylon 6	0.08	kg	ecoinvent 3.3 cutoff		GLO	technosphere	nylon 6
market for polypropylene, granulate	0.32	kg	ecoinvent 3.3 cutoff		GLO	technosphere	polypropylene, granulate
market for packaging film, low density polyethylene	0.025	kg	ecoinvent 3.3 cutoff		GLO	technosphere	packaging film, low density polyethylene
market for injection moulding	0.47	kg	ecoinvent 3.3 cutoff		GLO	technosphere	injection moulding
market for sheet rolling, aluminium	0.5	kg	ecoinvent 3.3 cutoff		GLO	technosphere	sheet rolling, aluminium
market for aluminium casting facility	7.7e-11	unit	ecoinvent 3.3 cutoff		GLO	technosphere	aluminium casting facility
market for plastic processing factory	3.5e-10	unit	ecoinvent 3.3 cutoff		GLO	technosphere	plastic processing factory
Activity	market for styrene butadiene rubber (SBR)
production amount	1
reference product	market for styrene butadiene rubber (SBR)
type	process
unit	kilogram
Exchanges
name	amount	unit	database	categories	location	type	reference product
Heat, waste	15.73	megajoule	biosphere3	air		biosphere
NMVOC, non-methane volatile organic compounds, unspecified origin	0.0144	kilogram	biosphere3	air		biosphere
Water, cooling, unspecified natural origin	0.25	cubic meter	biosphere3	natural resource::in water		biosphere
market for styrene butadiene rubber (SBR)	1	kilogram	base NIB-10C import			production	market for styrene butadiene rubber (SBR)
market for butadiene	0.752	kilogram	ecoinvent 3.3 cutoff		GLO	technosphere	butadiene
market for cyclohexane	0.01	kilogram	ecoinvent 3.3 cutoff		GLO	technosphere	cyclohexane
market for soap	0.0273	kilogram	ecoinvent 3.3 cutoff		GLO	technosphere	soap
market for sodium persulfate	0.00504	kilogram	ecoinvent 3.3 cutoff		GLO	technosphere	sodium persulfate
market for styrene	0.251	kilogram	ecoinvent 3.3 cutoff		GLO	technosphere	styrene
market for water, deionised, from tap water, at user	1.8	kilogram	ecoinvent 3.3 cutoff		RoW	technosphere	water, deionised, from tap water, at user
market group for electricity, medium voltage	0.55	kilowatt hour	ecoinvent 3.3 cutoff		ENTSO-E	technosphere	electricity, medium voltage
market group for heat, central or small-scale, natural gas	13.75	megajoule	ecoinvent 3.3 cutoff		RER	technosphere	heat, central or small-scale, natural gas
treatment of wastewater, unpolluted, capacity 5E9l/year	-1.8	cubic meter	ecoinvent 3.3 cutoff		RoW	technosphere	wastewater, unpolluted

## Sheet: optimistic_NIB4C
cutoff	10
Database	optimistic NIB-4C import
format	Excel spreadsheet
Activity	optimistic NIB-4C cell
comment
location	GLO
production amount	1
unit	kWh
Exchanges
name	amount	unit	database	categories	location	type	reference product	Comment
optimistic NIB-4C cell	1	kilowatt hour	optimistic NIB-4C import		GLO	production
Anode paste	1.73522	kg	optimistic NIB-4C import		GLO	technosphere
Cathode paste	5.02073	kg	optimistic NIB-4C import		GLO	technosphere
Copper current collector	0	kg	optimistic NIB-4C import		GLO	technosphere
Aluminum current collector	0.787037	kg	optimistic NIB-4C import		GLO	technosphere
Electrolyte	1.20228	kg	optimistic NIB-4C import		GLO	technosphere
Separator	0.300375	kg	optimistic NIB-4C import		GLO	technosphere
Cell container	0.279762	kg	optimistic NIB-4C import		GLO	technosphere		Assumption: cell container accounts for 3wt.% of battery cell
Water	46.2525	unit	optimistic NIB-4C import		GLO	technosphere
Energy	56.8387	kilowatt hour	optimistic NIB-4C import		KR	technosphere
Activity	Water
comment
location	GLO
production amount	1
unit	unit
Exchanges
name	amount	unit	database	categories	location	type	reference product	Comment
market for water, decarbonised, at user	1	kilogram	ecoinvent 3.3 cutoff		GLO	technosphere	water, decarbonised, at user
Activity	Energy
comment
location	KR
production amount	1
unit	kilowatt hour
Exchanges
name	amount	unit	database	categories	location	type	reference product	Comment
market for electricity, medium voltage	0.5	kilowatt hour	ecoinvent 3.3 cutoff		KR	technosphere	electricity, medium voltage
heat production, natural gas, at industrial furnace low-NOx >100kW	1.8	megajoule	ecoinvent 3.3 cutoff		RoW	technosphere	heat, district or industrial, natural gas
Activity	Copper current collector
comment
location	GLO
production amount	1
unit	kg
Exchanges
name	amount	unit	database	categories	location	type	reference product	Comment
market for copper	1	kg	ecoinvent 3.3 cutoff		GLO	technosphere	copper
market for sheet rolling, copper	1	kg	ecoinvent 3.3 cutoff		GLO	technosphere	sheet rolling, copper
Activity	Anode paste
comment
location	GLO
production amount	1
unit	kg
Exchanges
name	amount	unit	database	categories	location	type	reference product	Comment
Hard carbon	0.93	kg	base NIB-10C import		GLO	technosphere
market for carboxymethyl cellulose, powder	0.021	kg	ecoinvent 3.3 cutoff		GLO	technosphere	carboxymethyl cellulose, powder
market for styrene butadiene rubber (SBR)	0.009	kg	base NIB-10C import			technosphere	market for styrene butadiene rubber (SBR)
market for carbon black	0.04	kg	ecoinvent 3.3 cutoff		GLO	technosphere	carbon black
Activity	Hard carbon
comment	Hard carbon from sugar precursor, inventory from: Peters et al.; Energy and Environmental Science 2016, 9, 1744
location	GLO
production amount	1
unit	kg
Exchanges
name	amount	unit	database	categories	location	type	reference product	Comment
Hard carbon	1	kg	base NIB-10C import		GLO	production
market for sugar beet	20	kg	ecoinvent 3.3 cutoff		RoW	technosphere	sugar beet
market group for electricity, medium voltage	0.107	kilowatt hour	ecoinvent 3.3 cutoff		ENTSO-E	technosphere	electricity, medium voltage
market for heat, central or small-scale, natural gas	9.52	MJ	ecoinvent 3.3 cutoff		Europe without Switzerland	technosphere	heat, central or small-scale, natural gas
market for water, deionised, from tap water, at user	0.178	kg	ecoinvent 3.3 cutoff		RoW	technosphere	water, deionised, from tap water, at user
market for chemicals, inorganic	0.267	kg	ecoinvent 3.3 cutoff		GLO	technosphere	chemical, inorganic
market for nitrogen, liquid	6.99	kg	ecoinvent 3.3 cutoff		RoW	technosphere	nitrogen, liquid
market for chemical factory, organics	4e-10	unit	ecoinvent 3.3 cutoff		GLO	technosphere	chemical factory, organics
Carbon dioxide, non-fossil	29.33	kg	biosphere3	air		biosphere					Emissions that cannot be considered because they are not in the database
Carbon monoxide, non-fossil	0.000353	kg	biosphere3	air		biosphere
Nitrogen oxides	0.00616	kg	biosphere3	air		biosphere					Dust
Sulfur dioxide	0.00117	kg	biosphere3	air		biosphere					Wastewater
NMVOC, non-methane volatile organic compounds, unspecified origin	0.00011	kg	biosphere3	air		biosphere					Solid waste
Hydrogen fluoride	8.89e-06	kg	biosphere3	air		biosphere
Hydrogen chloride	0.000508	kg	biosphere3	air		biosphere
Heat, waste	9.9	MJ	biosphere3	air		biosphere
Activity	Aluminum current collector
comment
location	GLO
production amount	1
unit	kg
Exchanges
name	amount	unit	database	categories	location	type	reference product	Comment
market for aluminium scrap, new	1	kg	ecoinvent 3.3 cutoff		RoW	technosphere	aluminium scrap, new
market for sheet rolling, aluminium	1	kg	ecoinvent 3.3 cutoff		GLO	technosphere	sheet rolling, aluminium
Activity	Cathode paste
comment
location	GLO
production amount	1
unit	kg
Exchanges
name	amount	unit	database	categories	location	type	reference product	Comment
market for polyvinylfluoride	0.03	kg	ecoinvent 3.3 cutoff		GLO	technosphere	polyvinylfluoride
market for carbon black	0.04	kg	ecoinvent 3.3 cutoff		GLO	technosphere	carbon black
Positive active material	0.93	kg	base NIB-10C import		GLO	technosphere
market for N-methyl-2-pyrrolidone	0.41	kg	ecoinvent 3.3 cutoff		GLO	technosphere	N-methyl-2-pyrrolidone
Activity	Positive active material
comment	Positive active material = Na(Ni1/3Co1/3Mn1/3)O2, it is assumed that the material can be synthesized in the same reaction as its Li analogue
location	GLO
production amount	1
unit	kg
Exchanges
name	amount	unit	database	categories	location	type	reference product	Comment
market for sodium hydroxide, without water, in 50% solution state	0.356	kg	ecoinvent 3.3 cutoff		GLO	technosphere	sodium hydroxide, without water, in 50% solution state
Ni1/3Co1/3Mn1/3(OH)2	0.814	kg	base NIB-10C import		GLO	technosphere
market for chemical factory, organics	4.6e-10	unit	ecoinvent 3.3 cutoff		GLO	technosphere	chemical factory, organics
market for heat, district or industrial, natural gas	0.55	MJ	ecoinvent 3.3 cutoff		RoW	technosphere	heat, district or industrial, natural gas
Activity	Ni1/3Co1/3Mn1/3(OH)2
comment	Inventory adapted from: Majeau-Bettez et al.; Environmental Science and Technology 2011, 45, 4548. Ellingsen et al.; J. Industrial Ecology 2014, 18 (1), 113
location	GLO
production amount	1
unit	kg
Exchanges
name	amount	unit	database	categories	location	type	reference product	Comment
market for nickel sulfate	0.57	kg	ecoinvent 3.3 cutoff		GLO	technosphere	nickel sulfate
Cobalt sulfate	0.57	kg	base NIB-10C import		GLO	technosphere
market for manganese sulfate	0.55	kg	ecoinvent 3.3 cutoff		GLO	technosphere	manganese sulfate
market for sodium hydroxide, without water, in 50% solution state	1.76	kg	ecoinvent 3.3 cutoff		GLO	technosphere	sodium hydroxide, without water, in 50% solution state
market for chemical factory, organics	4e-10	unit	ecoinvent 3.3 cutoff		GLO	technosphere	chemical factory, organics
Sulfate	1.6	kg	biosphere3	water		biosphere
Activity	Cobalt sulfate
comment	Inventory adapted from: Majeau-Bettez et al.; Environmental Science and Technology 2011, 45, 4548
location	GLO
production amount	1
unit	kg
Exchanges
name	amount	unit	database	categories	location	type	reference product	Comment
market for cobalt	0.3802	kg	ecoinvent 3.3 cutoff		GLO	technosphere	cobalt
market for carbon monoxide	-0.11	kg	ecoinvent 3.3 cutoff		RER	technosphere	carbon monoxide
market for hydrogen, liquid	-0.0079	kg	ecoinvent 3.3 cutoff		RER	technosphere	hydrogen, liquid
market for blasting	-0.11	kg	ecoinvent 3.3 cutoff		GLO	technosphere	blasting
market for heat, district or industrial, natural gas	-0.76	MJ	ecoinvent 3.3 cutoff		RoW	technosphere	heat, district or industrial, natural gas
Activity	Electrolyte
comment
location	GLO
production amount	1
unit	kg
Exchanges
name	amount	unit	database	categories	location	type	reference product	Comment
Sodium hexafluorophosphate	0.14	kg	base NIB-10C import		GLO	technosphere		1M solution
market for ethylene carbonate	0.86	kg	ecoinvent 3.3 cutoff		GLO	technosphere	ethylene carbonate
Activity	Sodium hexafluorophosphate
comment	Inventory from: Peters et al.; Energy and Environmental Science 2016, 9, 1744
location	GLO
production amount	1
unit	kg
Exchanges
name	amount	unit	database	categories	location	type	reference product	Comment
Sodium hexafluorophosphate	1	kg	base NIB-10C import		GLO	production
market for sodium fluoride	0.319	kg	ecoinvent 3.3 cutoff		GLO	technosphere	sodium fluoride
market for phosphorus pentachloride	1.98	kg	ecoinvent 3.3 cutoff		GLO	technosphere	phosphorus pentachloride
market for hydrogen fluoride	4.04	kg	ecoinvent 3.3 cutoff		GLO	technosphere	hydrogen fluoride				Emissions that cannot be considered because they are not in the database
market for nitrogen, liquid	0.00125	kg	ecoinvent 3.3 cutoff		RoW	technosphere	nitrogen, liquid
market for lime, hydrated, packed	7.44	kg	ecoinvent 3.3 cutoff		GLO	technosphere	lime, hydrated, packed				Disposal of salts
market group for electricity, medium voltage	0.541	kilowatt hour	ecoinvent 3.3 cutoff		ENTSO-E	technosphere	electricity, medium voltage				Wastewater
market for chemical factory, organics	4e-10	unit	ecoinvent 3.3 cutoff		GLO	technosphere	chemical factory, organics				NaF recycled
Phosphorus trichloride	0.263	kg	biosphere3	air		biosphere
Heat, waste	1.95	MJ	biosphere3	air		biosphere
Activity	Separator
comment
location	GLO
production amount	1
unit	kg
Exchanges
name	amount	unit	database	categories	location	type	reference product	Comment
market for polypropylene, granulate	0.5	kg	ecoinvent 3.3 cutoff		GLO	technosphere	polypropylene, granulate
market for polyethylene, low density, granulate	0.5	kg	ecoinvent 3.3 cutoff		GLO	technosphere	polyethylene, low density, granulate
market for extrusion, plastic film	1	kg	ecoinvent 3.3 cutoff		GLO	technosphere	extrusion, plastic film
Activity	Cell container
comment
location	GLO
production amount	1
unit	kg
Exchanges
name	amount	unit	database	categories	location	type	reference product	Comment
Tab Aluminum	0.22	kg	base NIB-10C import		GLO	technosphere
Tab Copper	0.38	kg	base NIB-10C import		GLO	technosphere
Multilayer pouch	0.4	kg	base NIB-10C import		GLO	technosphere
Activity	Tab Aluminum
comment
location	GLO
production amount	1
unit	kg
Exchanges
name	amount	unit	database	categories	location	type	reference product	Comment
aluminium ingot, primary, to aluminium, wrought alloy market	1	kg	ecoinvent 3.3 cutoff		GLO	technosphere	aluminium, wrought alloy
market for sheet rolling, aluminium	1	kg	ecoinvent 3.3 cutoff		GLO	technosphere	sheet rolling, aluminium
market for aluminium casting facility	1.5e-10	unit	ecoinvent 3.3 cutoff		GLO	technosphere	aluminium casting facility
Activity	Tab Copper
comment
location	GLO
production amount	1
unit	kg
Exchanges
name	amount	unit	database	categories	location	type	reference product	Comment
market for copper	1	kg	ecoinvent 3.3 cutoff		GLO	technosphere	copper
market for sheet rolling, copper	1	kg	ecoinvent 3.3 cutoff		GLO	technosphere	sheet rolling, copper
market for metal working factory	4.6e-10	unit	ecoinvent 3.3 cutoff		GLO	technosphere	metal working factory
Activity	Multilayer pouch
comment
location	GLO
production amount	1
unit	kg
Exchanges
name	amount	unit	database	categories	location	type	reference product	Comment
aluminium ingot, primary, to aluminium, wrought alloy market	0.5	kg	ecoinvent 3.3 cutoff		GLO	technosphere	aluminium, wrought alloy
market for polyethylene terephthalate, granulate, amorphous	0.078	kg	ecoinvent 3.3 cutoff		GLO	technosphere	polyethylene terephthalate, granulate, amorphous
market for nylon 6	0.08	kg	ecoinvent 3.3 cutoff		GLO	technosphere	nylon 6
market for polypropylene, granulate	0.32	kg	ecoinvent 3.3 cutoff		GLO	technosphere	polypropylene, granulate
market for packaging film, low density polyethylene	0.025	kg	ecoinvent 3.3 cutoff		GLO	technosphere	packaging film, low density polyethylene
market for injection moulding	0.47	kg	ecoinvent 3.3 cutoff		GLO	technosphere	injection moulding
market for sheet rolling, aluminium	0.5	kg	ecoinvent 3.3 cutoff		GLO	technosphere	sheet rolling, aluminium
market for aluminium casting facility	7.7e-11	unit	ecoinvent 3.3 cutoff		GLO	technosphere	aluminium casting facility
market for plastic processing factory	3.5e-10	unit	ecoinvent 3.3 cutoff		GLO	technosphere	plastic processing factory
Activity	market for styrene butadiene rubber (SBR)
production amount	1
reference product	market for styrene butadiene rubber (SBR)
type	process
unit	kilogram
Exchanges
name	amount	unit	database	categories	location	type	reference product
Heat, waste	15.73	megajoule	biosphere3	air		biosphere
NMVOC, non-methane volatile organic compounds, unspecified origin	0.0144	kilogram	biosphere3	air		biosphere
Water, cooling, unspecified natural origin	0.25	cubic meter	biosphere3	natural resource::in water		biosphere
market for styrene butadiene rubber (SBR)	1	kilogram	base NIB-10C import			production	market for styrene butadiene rubber (SBR)
market for butadiene	0.752	kilogram	ecoinvent 3.3 cutoff		GLO	technosphere	butadiene
market for cyclohexane	0.01	kilogram	ecoinvent 3.3 cutoff		GLO	technosphere	cyclohexane
market for soap	0.0273	kilogram	ecoinvent 3.3 cutoff		GLO	technosphere	soap
market for sodium persulfate	0.00504	kilogram	ecoinvent 3.3 cutoff		GLO	technosphere	sodium persulfate
market for styrene	0.251	kilogram	ecoinvent 3.3 cutoff		GLO	technosphere	styrene
market for water, deionised, from tap water, at user	1.8	kilogram	ecoinvent 3.3 cutoff		RoW	technosphere	water, deionised, from tap water, at user
market group for electricity, medium voltage	0.55	kilowatt hour	ecoinvent 3.3 cutoff		ENTSO-E	technosphere	electricity, medium voltage
market group for heat, central or small-scale, natural gas	13.75	megajoule	ecoinvent 3.3 cutoff		RER	technosphere	heat, central or small-scale, natural gas
treatment of wastewater, unpolluted, capacity 5E9l/year	-1.8	cubic meter	ecoinvent 3.3 cutoff		RoW	technosphere	wastewater, unpolluted

## Sheet: optimistic_NIB10C
cutoff	10
Database	optimistic NIB-10C import
format	Excel spreadsheet
Activity	optimistic NIB-10C cell
comment
location	GLO
production amount	1
unit	kWh
Exchanges
name	amount	unit	database	categories	location	type	reference product	Comment
optimistic NIB-10C cell	1	kilowatt hour	optimistic NIB-10C import		GLO	production
Anode paste	1.88743	kg	optimistic NIB-10C import		GLO	technosphere
Cathode paste	5.46053	kg	optimistic NIB-10C import		GLO	technosphere
Copper current collector	0	kg	optimistic NIB-10C import		GLO	technosphere
Aluminum current collector	1.1369	kg	optimistic NIB-10C import		GLO	technosphere
Electrolyte	1.61265	kg	optimistic NIB-10C import		GLO	technosphere
Separator	0.433901	kg	optimistic NIB-10C import		GLO	technosphere
Cell container	0.325713	kg	optimistic NIB-10C import		GLO	technosphere		Assumption: cell container accounts for 3wt.% of battery cell
Water	62.6191	unit	optimistic NIB-10C import		GLO	technosphere
Energy	76.9512	kilowatt hour	optimistic NIB-10C import		KR	technosphere
Activity	Water
comment
location	GLO
production amount	1
unit	unit
Exchanges
name	amount	unit	database	categories	location	type	reference product	Comment
market for water, decarbonised, at user	1	kilogram	ecoinvent 3.3 cutoff		GLO	technosphere	water, decarbonised, at user
Activity	Energy
comment
location	KR
production amount	1
unit	kilowatt hour
Exchanges
name	amount	unit	database	categories	location	type	reference product	Comment
market for electricity, medium voltage	0.5	kilowatt hour	ecoinvent 3.3 cutoff		KR	technosphere	electricity, medium voltage
heat production, natural gas, at industrial furnace low-NOx >100kW	1.8	megajoule	ecoinvent 3.3 cutoff		RoW	technosphere	heat, district or industrial, natural gas
Activity	Copper current collector
comment
location	GLO
production amount	1
unit	kg
Exchanges
name	amount	unit	database	categories	location	type	reference product	Comment
market for copper	1	kg	ecoinvent 3.3 cutoff		GLO	technosphere	copper
market for sheet rolling, copper	1	kg	ecoinvent 3.3 cutoff		GLO	technosphere	sheet rolling, copper
Activity	Anode paste
comment
location	GLO
production amount	1
unit	kg
Exchanges
name	amount	unit	database	categories	location	type	reference product	Comment
Hard carbon	0.93	kg	base NIB-10C import		GLO	technosphere
market for carboxymethyl cellulose, powder	0.021	kg	ecoinvent 3.3 cutoff		GLO	technosphere	carboxymethyl cellulose, powder
market for styrene butadiene rubber (SBR)	0.009	kg	base NIB-10C import			technosphere	market for styrene butadiene rubber (SBR)
market for carbon black	0.04	kg	ecoinvent 3.3 cutoff		GLO	technosphere	carbon black
Activity	Hard carbon
comment	Hard carbon from sugar precursor, inventory from: Peters et al.; Energy and Environmental Science 2016, 9, 1744
location	GLO
production amount	1
unit	kg
Exchanges
name	amount	unit	database	categories	location	type	reference product	Comment
Hard carbon	1	kg	base NIB-10C import		GLO	production
market for sugar beet	20	kg	ecoinvent 3.3 cutoff		RoW	technosphere	sugar beet
market group for electricity, medium voltage	0.107	kilowatt hour	ecoinvent 3.3 cutoff		ENTSO-E	technosphere	electricity, medium voltage
market for heat, central or small-scale, natural gas	9.52	MJ	ecoinvent 3.3 cutoff		Europe without Switzerland	technosphere	heat, central or small-scale, natural gas
market for water, deionised, from tap water, at user	0.178	kg	ecoinvent 3.3 cutoff		RoW	technosphere	water, deionised, from tap water, at user
market for chemicals, inorganic	0.267	kg	ecoinvent 3.3 cutoff		GLO	technosphere	chemical, inorganic
market for nitrogen, liquid	6.99	kg	ecoinvent 3.3 cutoff		RoW	technosphere	nitrogen, liquid
market for chemical factory, organics	4e-10	unit	ecoinvent 3.3 cutoff		GLO	technosphere	chemical factory, organics
Carbon dioxide, non-fossil	29.33	kg	biosphere3	air		biosphere					Emissions that cannot be considered because they are not in the database
Carbon monoxide, non-fossil	0.000353	kg	biosphere3	air		biosphere
Nitrogen oxides	0.00616	kg	biosphere3	air		biosphere					Dust
Sulfur dioxide	0.00117	kg	biosphere3	air		biosphere					Wastewater
NMVOC, non-methane volatile organic compounds, unspecified origin	0.00011	kg	biosphere3	air		biosphere					Solid waste
Hydrogen fluoride	8.89e-06	kg	biosphere3	air		biosphere
Hydrogen chloride	0.000508	kg	biosphere3	air		biosphere
Heat, waste	9.9	MJ	biosphere3	air		biosphere
Activity	Aluminum current collector
comment
location	GLO
production amount	1
unit	kg
Exchanges
name	amount	unit	database	categories	location	type	reference product	Comment
market for aluminium scrap, new	1	kg	ecoinvent 3.3 cutoff		RoW	technosphere	aluminium scrap, new
market for sheet rolling, aluminium	1	kg	ecoinvent 3.3 cutoff		GLO	technosphere	sheet rolling, aluminium
Activity	Cathode paste
comment
location	GLO
production amount	1
unit	kg
Exchanges
name	amount	unit	database	categories	location	type	reference product	Comment
market for polyvinylfluoride	0.03	kg	ecoinvent 3.3 cutoff		GLO	technosphere	polyvinylfluoride
market for carbon black	0.04	kg	ecoinvent 3.3 cutoff		GLO	technosphere	carbon black
Positive active material	0.93	kg	base NIB-10C import		GLO	technosphere
market for N-methyl-2-pyrrolidone	0.41	kg	ecoinvent 3.3 cutoff		GLO	technosphere	N-methyl-2-pyrrolidone
Activity	Positive active material
comment	Positive active material = Na(Ni1/3Co1/3Mn1/3)O2, it is assumed that the material can be synthesized in the same reaction as its Li analogue
location	GLO
production amount	1
unit	kg
Exchanges
name	amount	unit	database	categories	location	type	reference product	Comment
market for sodium hydroxide, without water, in 50% solution state	0.356	kg	ecoinvent 3.3 cutoff		GLO	technosphere	sodium hydroxide, without water, in 50% solution state
Ni1/3Co1/3Mn1/3(OH)2	0.814	kg	base NIB-10C import		GLO	technosphere
market for chemical factory, organics	4.6e-10	unit	ecoinvent 3.3 cutoff		GLO	technosphere	chemical factory, organics
market for heat, district or industrial, natural gas	0.55	MJ	ecoinvent 3.3 cutoff		RoW	technosphere	heat, district or industrial, natural gas
Activity	Ni1/3Co1/3Mn1/3(OH)2
comment	Inventory adapted from: Majeau-Bettez et al.; Environmental Science and Technology 2011, 45, 4548. Ellingsen et al.; J. Industrial Ecology 2014, 18 (1), 113
location	GLO
production amount	1
unit	kg
Exchanges
name	amount	unit	database	categories	location	type	reference product	Comment
market for nickel sulfate	0.57	kg	ecoinvent 3.3 cutoff		GLO	technosphere	nickel sulfate
Cobalt sulfate	0.57	kg	base NIB-10C import		GLO	technosphere
market for manganese sulfate	0.55	kg	ecoinvent 3.3 cutoff		GLO	technosphere	manganese sulfate
market for sodium hydroxide, without water, in 50% solution state	1.76	kg	ecoinvent 3.3 cutoff		GLO	technosphere	sodium hydroxide, without water, in 50% solution state
market for chemical factory, organics	4e-10	unit	ecoinvent 3.3 cutoff		GLO	technosphere	chemical factory, organics
Sulfate	1.6	kg	biosphere3	water		biosphere
Activity	Cobalt sulfate
comment	Inventory adapted from: Majeau-Bettez et al.; Environmental Science and Technology 2011, 45, 4548
location	GLO
production amount	1
unit	kg
Exchanges
name	amount	unit	database	categories	location	type	reference product	Comment
market for cobalt	0.3802	kg	ecoinvent 3.3 cutoff		GLO	technosphere	cobalt
market for carbon monoxide	-0.11	kg	ecoinvent 3.3 cutoff		RER	technosphere	carbon monoxide
market for hydrogen, liquid	-0.0079	kg	ecoinvent 3.3 cutoff		RER	technosphere	hydrogen, liquid
market for blasting	-0.11	kg	ecoinvent 3.3 cutoff		GLO	technosphere	blasting
market for heat, district or industrial, natural gas	-0.76	MJ	ecoinvent 3.3 cutoff		RoW	technosphere	heat, district or industrial, natural gas
Activity	Electrolyte
comment
location	GLO
production amount	1
unit	kg
Exchanges
name	amount	unit	database	categories	location	type	reference product	Comment
Sodium hexafluorophosphate	0.14	kg	base NIB-10C import		GLO	technosphere		1M solution
market for ethylene carbonate	0.86	kg	ecoinvent 3.3 cutoff		GLO	technosphere	ethylene carbonate
Activity	Sodium hexafluorophosphate
comment	Inventory from: Peters et al.; Energy and Environmental Science 2016, 9, 1744
location	GLO
production amount	1
unit	kg
Exchanges
name	amount	unit	database	categories	location	type	reference product	Comment
Sodium hexafluorophosphate	1	kg	base NIB-10C import		GLO	production
market for sodium fluoride	0.319	kg	ecoinvent 3.3 cutoff		GLO	technosphere	sodium fluoride
market for phosphorus pentachloride	1.98	kg	ecoinvent 3.3 cutoff		GLO	technosphere	phosphorus pentachloride
market for hydrogen fluoride	4.04	kg	ecoinvent 3.3 cutoff		GLO	technosphere	hydrogen fluoride				Emissions that cannot be considered because they are not in the database
market for nitrogen, liquid	0.00125	kg	ecoinvent 3.3 cutoff		RoW	technosphere	nitrogen, liquid
market for lime, hydrated, packed	7.44	kg	ecoinvent 3.3 cutoff		GLO	technosphere	lime, hydrated, packed				Disposal of salts
market group for electricity, medium voltage	0.541	kilowatt hour	ecoinvent 3.3 cutoff		ENTSO-E	technosphere	electricity, medium voltage				Wastewater
market for chemical factory, organics	4e-10	unit	ecoinvent 3.3 cutoff		GLO	technosphere	chemical factory, organics				NaF recycled
Phosphorus trichloride	0.263	kg	biosphere3	air		biosphere
Heat, waste	1.95	MJ	biosphere3	air		biosphere
Activity	Separator
comment
location	GLO
production amount	1
unit	kg
Exchanges
name	amount	unit	database	categories	location	type	reference product	Comment
market for polypropylene, granulate	0.5	kg	ecoinvent 3.3 cutoff		GLO	technosphere	polypropylene, granulate
market for polyethylene, low density, granulate	0.5	kg	ecoinvent 3.3 cutoff		GLO	technosphere	polyethylene, low density, granulate
market for extrusion, plastic film	1	kg	ecoinvent 3.3 cutoff		GLO	technosphere	extrusion, plastic film
Activity	Cell container
comment
location	GLO
production amount	1
unit	kg
Exchanges
name	amount	unit	database	categories	location	type	reference product	Comment
Tab Aluminum	0.22	kg	base NIB-10C import		GLO	technosphere
Tab Copper	0.38	kg	base NIB-10C import		GLO	technosphere
Multilayer pouch	0.4	kg	base NIB-10C import		GLO	technosphere
Activity	Tab Aluminum
comment
location	GLO
production amount	1
unit	kg
Exchanges
name	amount	unit	database	categories	location	type	reference product	Comment
aluminium ingot, primary, to aluminium, wrought alloy market	1	kg	ecoinvent 3.3 cutoff		GLO	technosphere	aluminium, wrought alloy
market for sheet rolling, aluminium	1	kg	ecoinvent 3.3 cutoff		GLO	technosphere	sheet rolling, aluminium
market for aluminium casting facility	1.5e-10	unit	ecoinvent 3.3 cutoff		GLO	technosphere	aluminium casting facility
Activity	Tab Copper
comment
location	GLO
production amount	1
unit	kg
Exchanges
name	amount	unit	database	categories	location	type	reference product	Comment
market for copper	1	kg	ecoinvent 3.3 cutoff		GLO	technosphere	copper
market for sheet rolling, copper	1	kg	ecoinvent 3.3 cutoff		GLO	technosphere	sheet rolling, copper
market for metal working factory	4.6e-10	unit	ecoinvent 3.3 cutoff		GLO	technosphere	metal working factory
Activity	Multilayer pouch
comment
location	GLO
production amount	1
unit	kg
Exchanges
name	amount	unit	database	categories	location	type	reference product	Comment
aluminium ingot, primary, to aluminium, wrought alloy market	0.5	kg	ecoinvent 3.3 cutoff		GLO	technosphere	aluminium, wrought alloy
market for polyethylene terephthalate, granulate, amorphous	0.078	kg	ecoinvent 3.3 cutoff		GLO	technosphere	polyethylene terephthalate, granulate, amorphous
market for nylon 6	0.08	kg	ecoinvent 3.3 cutoff		GLO	technosphere	nylon 6
market for polypropylene, granulate	0.32	kg	ecoinvent 3.3 cutoff		GLO	technosphere	polypropylene, granulate
market for packaging film, low density polyethylene	0.025	kg	ecoinvent 3.3 cutoff		GLO	technosphere	packaging film, low density polyethylene
market for injection moulding	0.47	kg	ecoinvent 3.3 cutoff		GLO	technosphere	injection moulding
market for sheet rolling, aluminium	0.5	kg	ecoinvent 3.3 cutoff		GLO	technosphere	sheet rolling, aluminium
market for aluminium casting facility	7.7e-11	unit	ecoinvent 3.3 cutoff		GLO	technosphere	aluminium casting facility
market for plastic processing factory	3.5e-10	unit	ecoinvent 3.3 cutoff		GLO	technosphere	plastic processing factory
Activity	market for styrene butadiene rubber (SBR)
production amount	1
reference product	market for styrene butadiene rubber (SBR)
type	process
unit	kilogram
Exchanges
name	amount	unit	database	categories	location	type	reference product
Heat, waste	15.73	megajoule	biosphere3	air		biosphere
NMVOC, non-methane volatile organic compounds, unspecified origin	0.0144	kilogram	biosphere3	air		biosphere
Water, cooling, unspecified natural origin	0.25	cubic meter	biosphere3	natural resource::in water		biosphere
market for styrene butadiene rubber (SBR)	1	kilogram	base NIB-10C import			production	market for styrene butadiene rubber (SBR)
market for butadiene	0.752	kilogram	ecoinvent 3.3 cutoff		GLO	technosphere	butadiene
market for cyclohexane	0.01	kilogram	ecoinvent 3.3 cutoff		GLO	technosphere	cyclohexane
market for soap	0.0273	kilogram	ecoinvent 3.3 cutoff		GLO	technosphere	soap
market for sodium persulfate	0.00504	kilogram	ecoinvent 3.3 cutoff		GLO	technosphere	sodium persulfate
market for styrene	0.251	kilogram	ecoinvent 3.3 cutoff		GLO	technosphere	styrene
market for water, deionised, from tap water, at user	1.8	kilogram	ecoinvent 3.3 cutoff		RoW	technosphere	water, deionised, from tap water, at user
market group for electricity, medium voltage	0.55	kilowatt hour	ecoinvent 3.3 cutoff		ENTSO-E	technosphere	electricity, medium voltage
market group for heat, central or small-scale, natural gas	13.75	megajoule	ecoinvent 3.3 cutoff		RER	technosphere	heat, central or small-scale, natural gas
treatment of wastewater, unpolluted, capacity 5E9l/year	-1.8	cubic meter	ecoinvent 3.3 cutoff		RoW	technosphere	wastewater, unpolluted

[truncated: 3 more sheets: base_NIB025C, base_NIB4C, base_NIB10C]
